# Supplementary material
Source: PubMed Central journal article supplement (PMC4768914)
Supplement: NIHMS760947-supplement-SI.pdf [file NIHMS760947-supplement-SI.pdf]

## Supporting information for:

# **Blocking deprotonation with retention of aromaticity in a plant *ent*-copalyl diphosphate synthase leads to product rearrangement**

Kevin C. Potter, Jiachen Zi, Young J. Hong, Samuel Schulte, Brandi K. Malchow, Dean J. Tantillo and Reuben J. Peters

Roy J. Carver Dept. Biochemistry, Biophysics & Molecular Biology, Iowa State University, Ames, Iowa 50011, United States

Dept. Chemistry, University of California, Davis, California 95616, United States

## Table of Contents

|                                                                           |     |
|---------------------------------------------------------------------------|-----|
| Experimental Section .....                                                | S2  |
| Figure S1 .....                                                           | S4  |
| Table S1 and Figure S2 .....                                              | S4  |
| Figure S3 .....                                                           | S5  |
| Figure S4 .....                                                           | S5  |
| Figure S5 .....                                                           | S6  |
| Table S2 .....                                                            | S7  |
| Scheme S1 .....                                                           | S7  |
| Figure S6 .....                                                           | S7  |
| Figure S7 .....                                                           | S8  |
| Figure S8 .....                                                           | S9  |
| Quantum Chemical Calculation methods .....                                | S10 |
| References .....                                                          | S10 |
| Coordinates and Energies from Quantum Chemical Calculation analysis ..... | S11 |

## Experimental Section

All reagents were purchased from Fisher Scientific unless noted otherwise.

The recombinant AtCPS used here was expressed as a previously described pseudomature construct.<sup>1</sup> Mutants were generated by whole plasmid PCR amplification with overlapping mutagenic primers of pENTR/SD/D-TOPO (Invitrogen) clones, and verified by complete gene sequencing prior to transfer by directional recombination to expression vectors, pDEST17 and the previously described pGG-DEST.<sup>2</sup> The resulting constructs were heterologously expressed in the C41 OverExpress strain of *Escherichia coli* (Lucigen), much as previously described.<sup>3</sup> Briefly, recombinant mutant clones were grown in liquid NZY media (10 g casein, 10 g NaCl, 5 g yeast extract, 1 g MgSO<sub>4</sub> (anhydrous) in 1 L H<sub>2</sub>O, with pH adjusted to 7.0 using HCl) at 37 °C to OD<sub>600</sub> = 0.6, then shifted to 16 °C for an hour prior to induction with 0.5 mM IPTG, followed by incubation at 16 °C.

Enzymatic products were investigated by expression from pGG-DEST based constructs in our previously described modular metabolic engineering system,<sup>2</sup> which couples production of GGPP in *E. coli* with further engineering to increase flux into isoprenoid metabolism.<sup>4</sup> Briefly, use of our metabolic engineering system involves, at the time of induction, supplementation with phosphate buffer (pH 7.0) to 100 mM, sodium pyruvate to 50 mM, and MgCl<sub>2</sub> to 1 mM (final concentrations), as previously described.<sup>4</sup> After induction and further incubation for 3 days, products (dephosphorylated by endogenous phosphatases) are extracted by addition of an equal volume of hexanes and gentle swirling, the organic solvent is separated and then dried under N<sub>2</sub>, with the residue resuspended in fresh hexanes and analyzed by GC-MS.

Analysis of products by GC-MS was carried out much as previously described,<sup>5</sup> using a HP-5MS column (Agilent, 0.25 μm, 0.25ID, 30 m) on a 3900 GC with Saturn 2100T ion trap MS (Varian), with a 1.2 mL/min He flow rate, and the following oven temperature program: 50 °C for 3 min, 15 °C/min to 300 °C, hold 3 min. Samples (1 μL) underwent splitless injection at 250 °C.

To obtain a sufficient amount of (-)-kolavenol for NMR analysis, a total of 4 L of recombinant cultures were fermented and extracted as described above. (-)-Kolavenol was then purified much as previously described for other class II diterpene cyclase products.<sup>6,7</sup> After extraction, the phases were separated in a separatory funnel, and the pooled hexanes dried by rotary evaporation. The resulting extract was redissolved in 10 mL of fresh hexanes and fractionated over silica (4 g) using a Reveleris automated flash chromatography system (Grace, Deerfield, IL) with a 15 mL/min flow rate, 5 mL injections, UV detection at 200 nm, with the following stepwise gradient: 0%, 5%, 15%, 25% ethyl acetate/hexanes for 1 minute each and a final wash with 100% ethyl acetate for 3 minutes. The resulting fractions were analyzed by GC-MS, those containing the targeted (-)-kolavenol dried under N<sub>2</sub> and dissolved in 5 mL of 50% acetonitrile/dH<sub>2</sub>O. This was then further purified via HPLC (Agilent 1200 system) equipped with a Kromasil 100-5-C8 (4.6 x 150mm, 5μm) column at a flow rate of 0.5 mL/min. The column was pre-equilibrated, sample injected and washed with 50% acetonitrile/dH<sub>2</sub>O (0 - 2 minutes), eluted with 50 - 100% acetonitrile (2 - 7 minutes), and followed by a 100% acetonitrile wash (7 - 23 minutes). The purified (-)-kolavenol, with a final yield of ~1.5 mg, was dried under N<sub>2</sub> and redissolved in 0.5 mL CDCl<sub>3</sub>. This sample was analyzed by NMR carried out with a Bruker Avance 700 spectrometer equipped with a 5-mm HCN cryogenic probe for <sup>1</sup>H and <sup>13</sup>C detection using standard experiments from the Bruker TopSpin version 1.4 software. One-dimensional <sup>1</sup>H spectra were acquired at 700 MHz, and one-dimensional <sup>13</sup>C spectra acquired at 175 MHz. Chemical shifts were referenced using known chloroform

(<sup>13</sup>C 77.23, <sup>1</sup>H 7.24 ppm) signals offset from TMS (Table S1), and compared to those previously reported for (-)-kolavenol.<sup>8-11</sup>

Optical rotation analysis was performed on a JASCO DIP-370 using a 0.5 dm cell. (-)-kolavenol was resuspended in hexanes to give a final concentration of 1 mg/mL and loaded into the cell. The observed rotation reading obtained was -0.024, using the following formula  $[\alpha]_D^{23} = \frac{100 \cdot \alpha}{l \cdot c}$  (c= 0.1 (g/100 mL), C<sub>6</sub>H<sub>14</sub>) gave a specific rotation of  $[\alpha]_D^{23} = -48^\circ$ , which was comparable to that previously reported for (-)-kolavenol.<sup>8,9</sup>

For in vitro assays, the enzymes were expressed as pDEST17 based 6xHis tagged constructs for ease of purification, which was accomplished much as previously described.<sup>12</sup> Briefly, cells from overnight incubation following induction were harvested by centrifugation for (5,000 g × 20 min at 4 °C), lysed by gentle sonification in 10 mL lysis buffer (50 mM Bis-Tris (pH 6.8), 150 mM KCl, 10 mM MgCl<sub>2</sub>, 1 mM DTT, 10% glycerol), with the resulting lysate clarified by centrifugation (15,000 g × 20 min. at 4 °C). The tagged enzymes were purified over 5 mL of Ni-NTA His-bind resin (Novagen), in batch mode, with 30 minutes binding with mixing on a rotating disk mixer, followed by washing with 10 mL of 20mM imidazole and eluting with 5 mL of 250 mM imidazole in column buffer (50 mM Bis-Tris (pH 6.8), 1 mM DTT). Eluted protein was dialyzed using dialysis tubing (MW Cutoff = 12-14 kDa) against storage buffer (10 mM Bis-Tris (pH 6.8), 1 mM DTT, 10% glycerol).

In vitro assays for class II activity were carried out much as previously described.<sup>13</sup> Briefly, GGPP (Isoprenoids.com) was added to an assay tube and dried under N<sub>2</sub> gas. Then, assay buffer (50 mM HEPES (pH 7.75), 100 mM KCl, 0.1 mM MgCl<sub>2</sub>, 10% glycerol) and purified enzymes were added for 1 mL total volume assays (50 μM GGPP and 200 nM enzyme). After incubation overnight at 30 °C, reactions were terminated by incubation in a boiling water bath for 5 minutes. After cooling to room temp (15 minutes), reaction products were dephosphorylated by adding 10 μL of a solution of 1 M MgCl<sub>2</sub> and 0.1 M ZnCl<sub>2</sub> to the assays, followed by the addition of 15 units calf intestinal alkaline phosphatase (Promega), and incubated at 37 °C overnight. Assays were extracted with 3x1 mL hexanes, with the organic extract dried under N<sub>2</sub> gas, resuspended in 50 μL fresh hexanes and analyzed by GC-MS.

Kinetic analyses were carried out much as previously described.<sup>14</sup> The enzyme concentrations and time were varied to achieve approximately 2-8% product formation. Catalytic rates were determined from the observed fractional turnover (i.e. the ratio of product to the sum of the product and substrate). This was quantified via GC-FID. The kinetic parameters were calculated by fitting the reaction rate data to the substrate inhibition equation (Kaleidagraph 4.0; Synergy Software, Reading, PA, USA). All curve fits exhibited R<sup>2</sup> > 0.9.

For the D<sub>2</sub>O labeling assays, the pD for D<sub>2</sub>O assay buffer was adjusted using the D<sub>2</sub>O correction factor<sup>15</sup> of pD = pH + 0.4 with 5 M NaOH in D<sub>2</sub>O. The solution of 1 M MgCl<sub>2</sub> and 0.1 M ZnCl<sub>2</sub> was prepared in D<sub>2</sub>O as well. The purified enzymes were diluted (10-fold) and concentrated via ultrafiltration, using an Amicon Ultra centrifugal filter (MW cutoff = 10k Da), 3 times with D<sub>2</sub>O assay buffer. Assays, dephosphorylation, and analysis by GC-MS were otherwise carried out as described above.

Quantum chemical calculations made use of several density functional methods; details and references can be found below.

**Figure S1:** GC-MS based comparison of dephosphorylated AtCPS, AtCPS:H263A, AtCPS:H263Y, AtCPS:H263F, and KgTPS products with structures shown below.

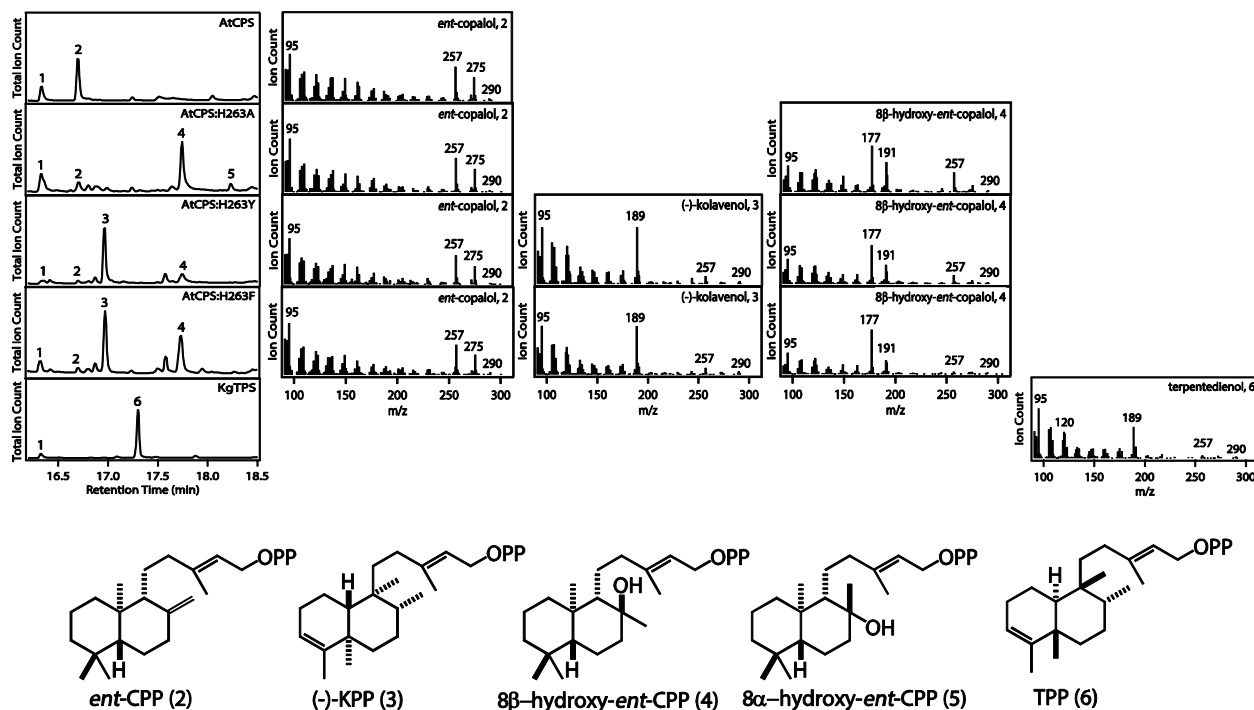

**Table S1:**  $^1\text{H}$  and  $^{13}\text{C}$  NMR data for (-)-kolavenol (CDCl<sub>3</sub>, 700 MHz for  $^1\text{H}$  NMR; 175 MHz for  $^{13}\text{C}$  NMR)

| Position | $\delta_{\text{H}}$             | $\delta_{\text{C}}$ |
|----------|---------------------------------|---------------------|
| 1a       | 1.50 (1H, m)                    | 18.8                |
| 1b       | 1.35 (1H, m)                    |                     |
| 2        | 1.94 (2H, m)                    | 27.5                |
| 3        | 5.11 (1H, )                     | 121.0               |
| 4        |                                 | 145.1               |
| 5        |                                 | 38.8                |
| 6        | 1.62 (1H, m)                    | 37.4                |
| 7        | 1.09 (1H, m)                    |                     |
| 8        | 1.34 (2H, m)                    | 28.1                |
| 9        | 1.39 (1H, m)                    | 36.8                |
| 10       | 1.27 (1H, m)                    | 39.2                |
| 11       | 1.27 (1H, m)                    | 47.0                |
| 12a      | 1.39 (1H, m)                    | 37.3                |
| 12b      | 1.73 (1H, m)                    |                     |
| 13       |                                 | 33.4                |
| 14a      | 5.31 (1H, )                     | 141.6               |
| 14b      |                                 |                     |
| 15       | 4.06 (2H, dd, $J = \text{Hz}$ ) | 60.1                |
| 16       | 1.59 (3H, s)                    | 17.1                |
| 17       | 0.72 (3H, s)                    | 16.6                |
| 18       | 0.63 (3H, s)                    | 19.0                |
| 19       | 0.91 (3H, s)                    | 20.5                |
| 20       | 1.50 (3H, s)                    | 18.6                |

**Figure S2:** Labeled carbon structure of (-)-kolavenol based on  $^{13}\text{C}$  data in Table S1.

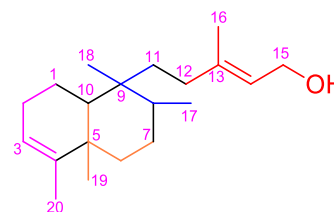

**Figure S3:**  $^1\text{H}$  1D spectrum obtained for (-)-kolavenol.

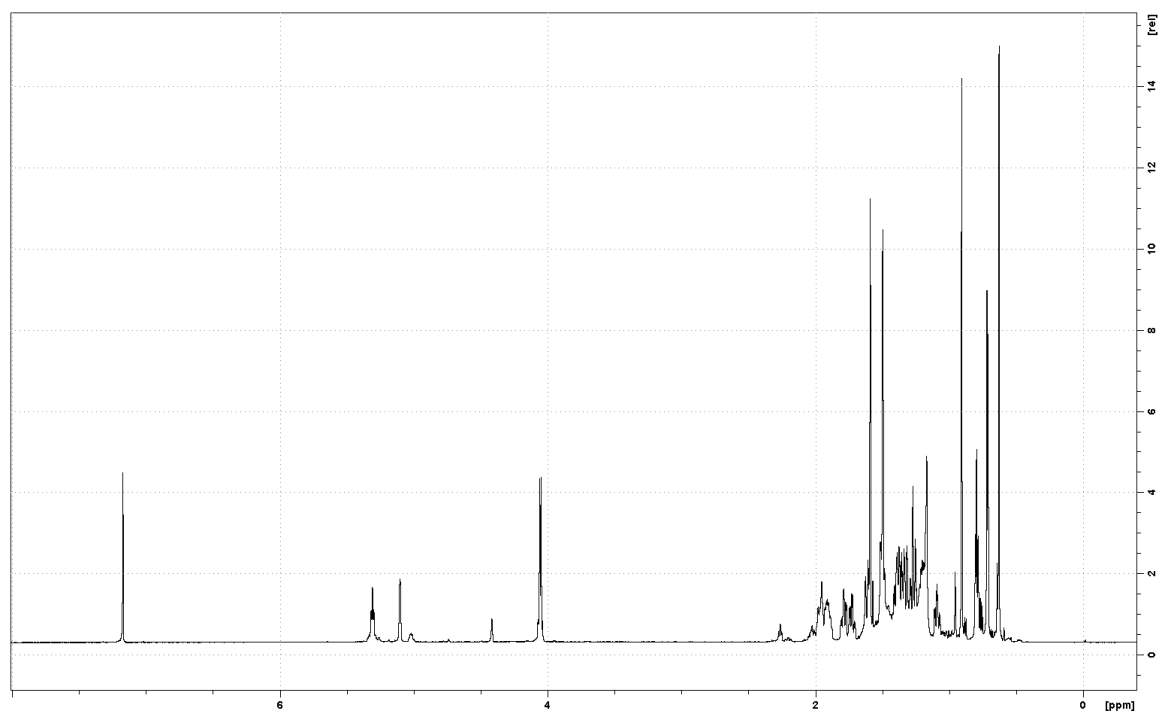

**Figure S4:**  $^{13}\text{C}$  1D spectrum obtained for (-)-kolavenol.

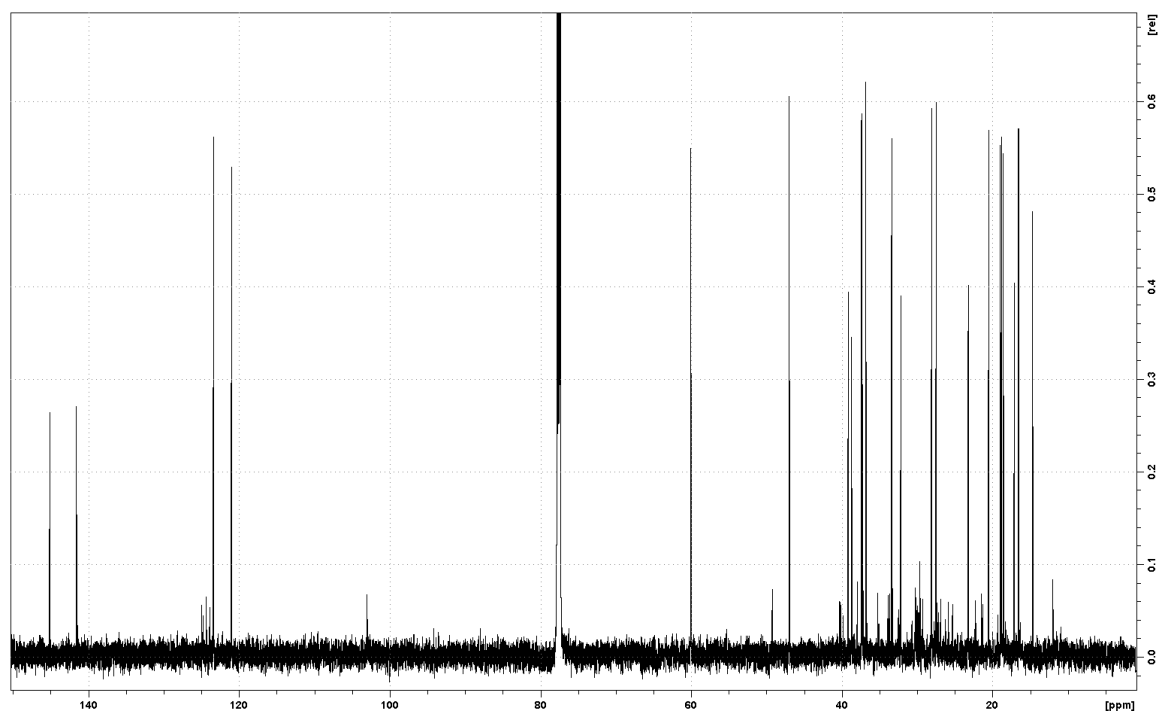

**Figure S5: Part a)** GC-MS comparison of dephosphorylated enzymatic products from overnight assays conducted in D<sub>2</sub>O. Control assays with both Wild-type and AtCPS:H263Y are shown in **I** and **III**, respectively. Assays performed in D<sub>2</sub>O for Wild-type and AtCPS:H263Y are shown in **II** and **IV**, respectively. Note (-)-kolavenol mass spectra is the same in both assays (**III** and **IV**), however the *ent*-copalol has a mass difference of +1 in the AtCPS in D<sub>2</sub>O assay (**II**). **Part b)** Shown is the reaction scheme for the assays performed in D<sub>2</sub>O.

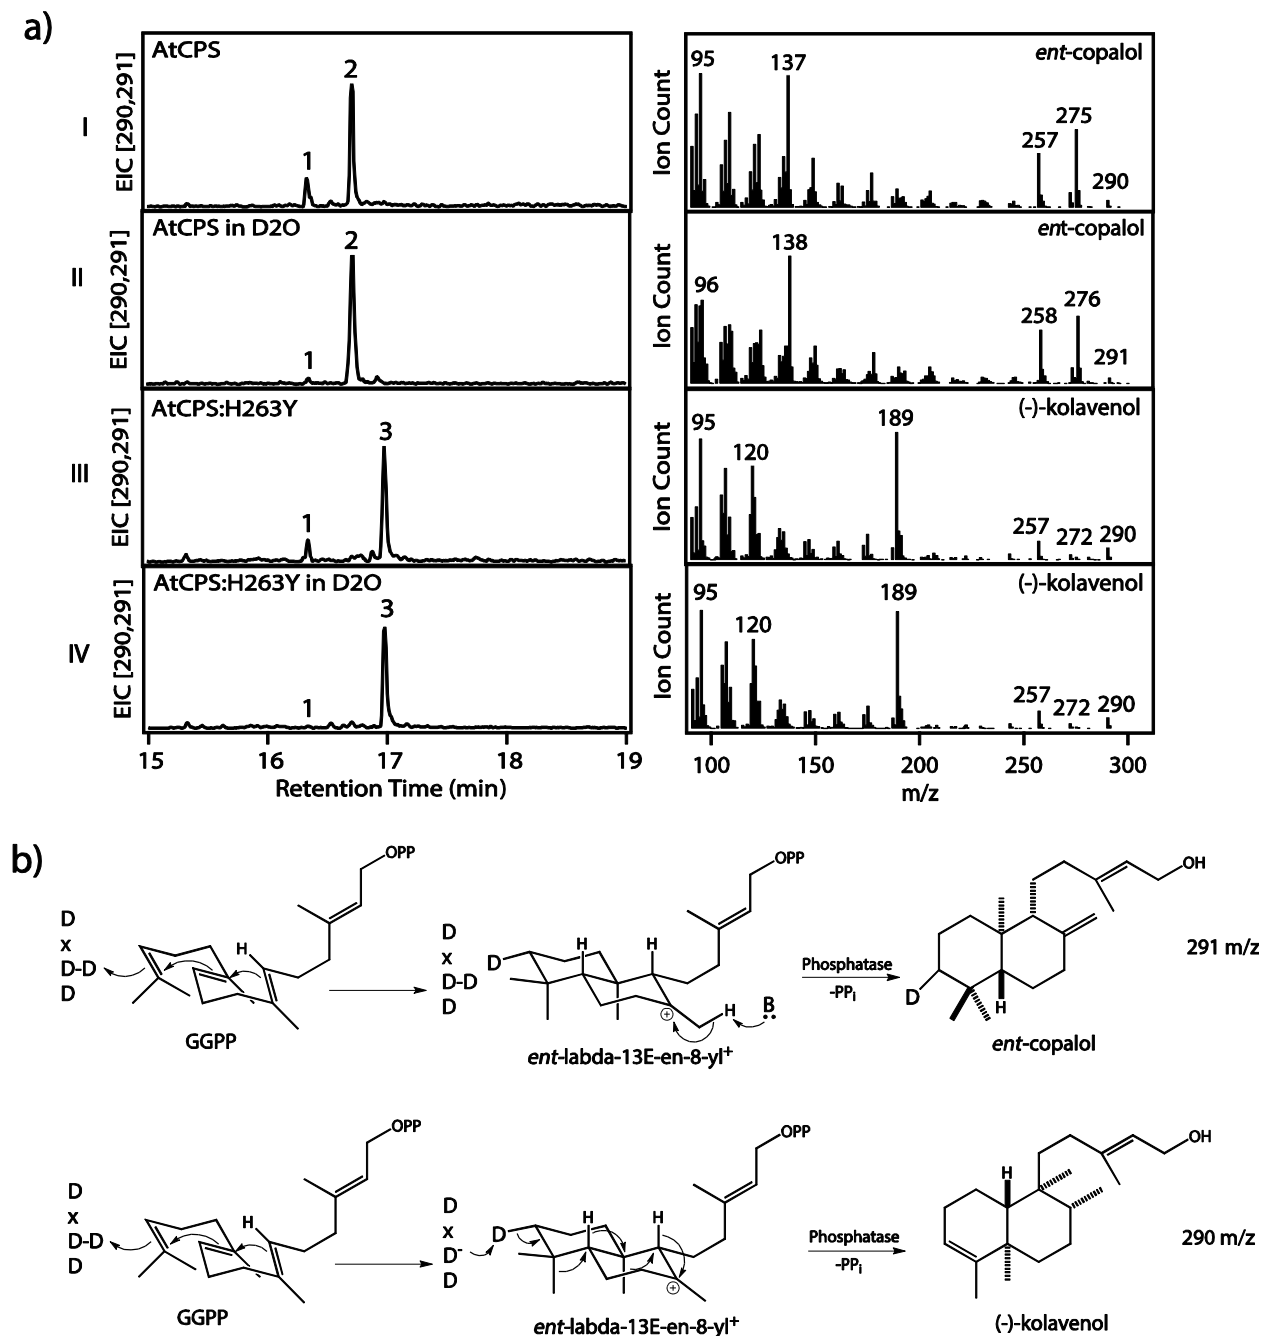

**Table S2:** Kinetic constants for wild-type (WT) and H263Y and H263F mutants of AtCPS.

|             | $k_{\text{cat}}$ ( $\text{s}^{-1}$ ) | $K_M$ ( $\mu\text{M}$ ) | $K_I$ ( $\mu\text{M}$ ) | $R^2$ |
|-------------|--------------------------------------|-------------------------|-------------------------|-------|
| AtCPS (WT)  | $0.3 \pm 0.1$                        | $5 \pm 3$               | $5 \pm 3$               | 0.92  |
| AtCPS:H263Y | $0.01 \pm 0.003$                     | $2.3 \pm 0.8$           | $26 \pm 11$             | 0.92  |
| AtCPS:H263F | $0.01 \pm 0.002$                     | $3.1 \pm 0.8$           | $20 \pm 6$              | 0.96  |

**Scheme S1:** All conformations of GGPP can be cyclized and further rearranged as illustrated here with halimadienyl diphosphate catalyzed by MtHPS, (-)-kolavenyl diphosphate catalyzed by AtCPS:H263Y and AtCPS:H263F, and terpentenedienyl diphosphate catalyzed by KgTPS.

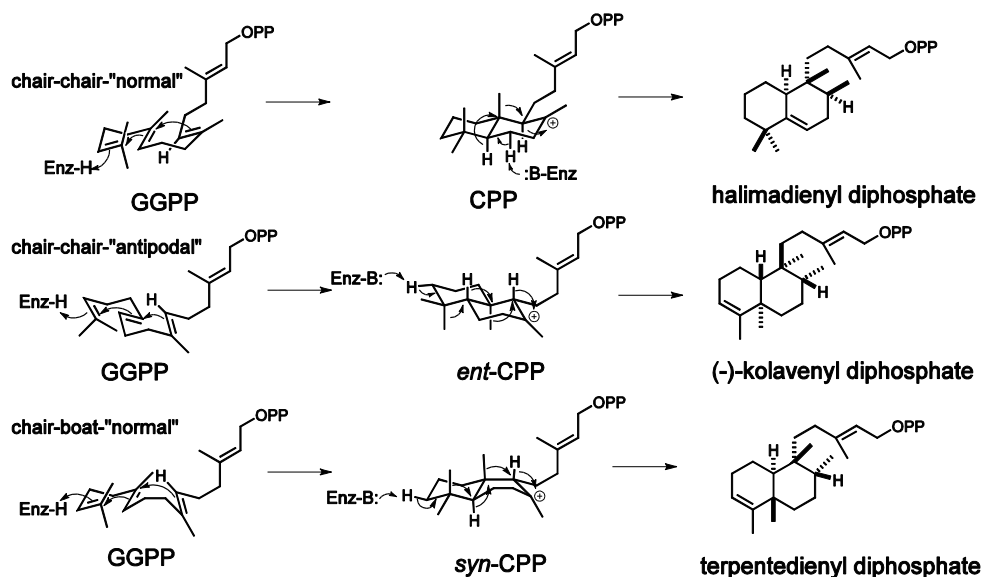

**Figure S6:** Overlay of the active sites of the wild-type enzyme (green) from the previously determined crystal structure, and AtCPS:H263Y mutant (cyan), generated via the mutagenesis feature in PyMol with choice of the rotamer most closely approximating the wild-type histidine. The DxDD motif is shown in stick representation on the left. The previously identified catalytic base group shown in stick representation (His263, Asn322 and ligated water molecule) of the wild-type enzyme on the right along with the overlay of the Tyr mutation and proposed hydrogen bond (red text) between Y263 and N322 in the AtCPS:H263Y mutant.

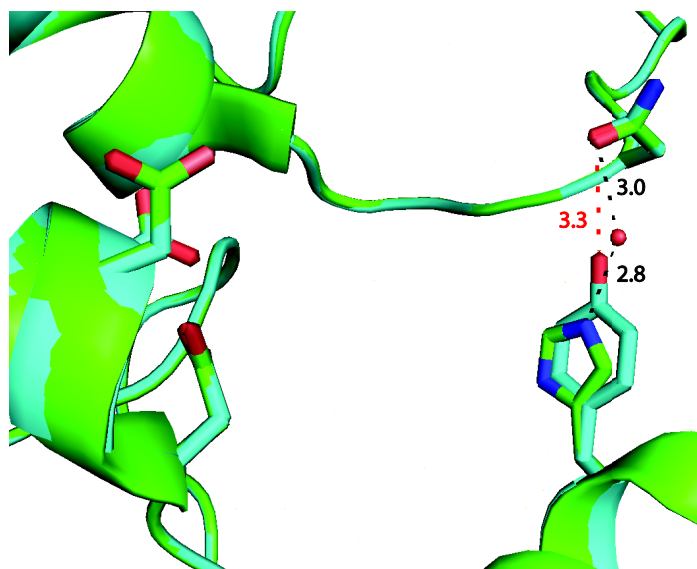

Figure S7. Theozyme calculations on bicyclization reaction.

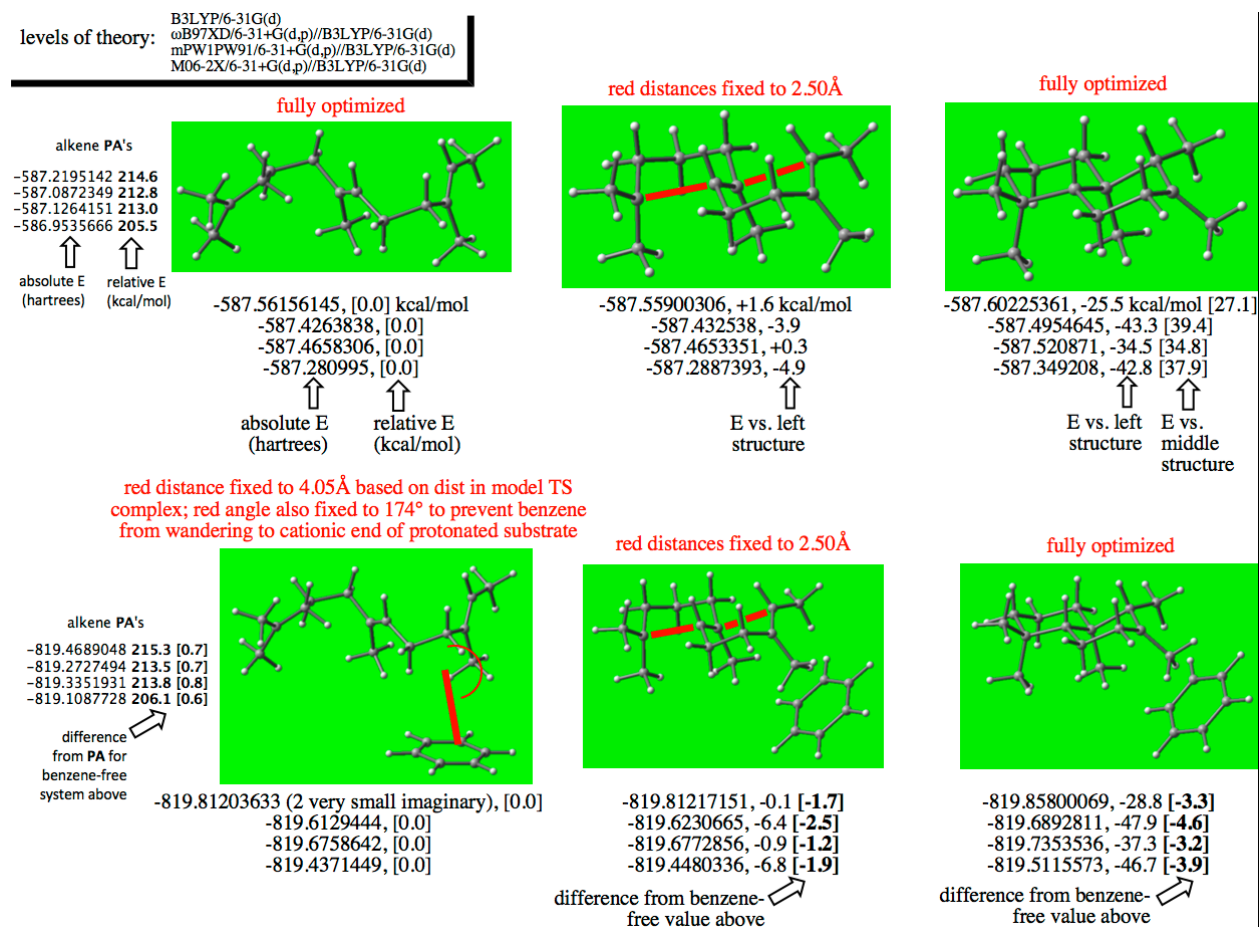



**Figure S8.** Carbocation minima and transition state structures for hydride and methyl shifts. Note that a truncated model of the diphosphate group was used. Relative energies (B3LYP/6-31+G(d,p) and mPW1PW91/6-31+G(d,p)//B3LYP/6-31+G(d,p) [in brackets]) are shown in kcal/mol and distances are shown in Å.

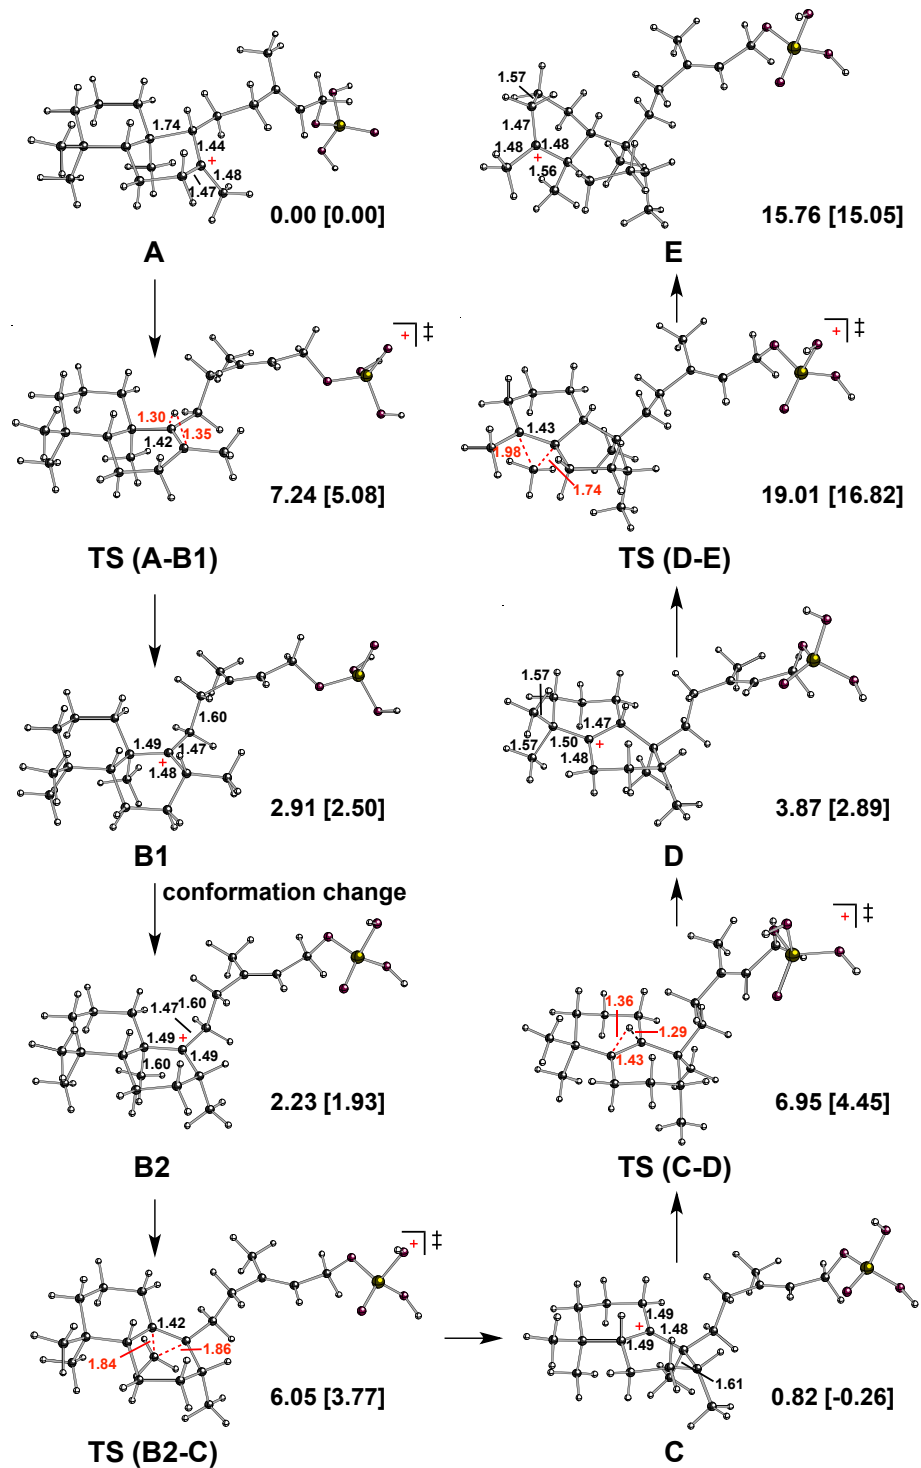

# Quantum Chemical Calculations

Calculations were performed with GAUSSIAN03<sup>13</sup> and GAUSSIAN09.<sup>14</sup> Geometries were optimized using the B3LYP method with the basis set of 6-31+G(d,p) in the absence and 6-31G(d) in the presence of theozymes.<sup>15</sup> All stationary points were characterized as minima or transition state structures using frequency calculations at the same level. All reported energies include zero-point energy corrections (unscaled) from the frequency calculations at the same level. Intrinsic reaction coordinate (IRC) calculations were used for further characterization of transition state structures.<sup>16</sup> mPW1PW91<sup>17</sup> single point energies are also shown, since it is known that B3LYP underestimates the relative energies of cyclic structures versus acyclic isomers.<sup>17</sup> The validity of this computational approach for examining terpene-forming carbocation rearrangements is well-established.<sup>18</sup> Structural images were created with *Ball&Stick*.<sup>19</sup>

## References

- (1) Prisic, S.; Peters, R. J. *Plant Physiol.* **2007**, *144*, 445-454.
- (2) Cyr, A.; Wilderman, P. R.; Determan, M.; Peters, R. J. *J. Am. Chem. Soc.* **2007**, *129*, 6684-6685.
- (3) Peters, R. J.; Flory, J. E.; Jetter, R.; Ravn, M. M.; Lee, H.-J.; Coates, R. M.; Croteau, R. B. *Biochemistry* **2000**, *39*, 15592-15602.
- (4) Morrone, D.; Lowry, L.; Determan, M. K.; Hershey, D. M.; Xu, M.; Peters, R. J. *Appl. Microbiol. Biotechnol.* **2010**, *85*, 1893-1906.
- (5) Morrone, D.; Chen, X.; Coates, R. M.; Peters, R. J. *Biochem. J.* **2010**, *431*, 337-344.
- (6) Potter, K.; Criswell, J.; Peters, R. J. *Angew. Chem. Int. Ed.* **2014**, *53*, 7198-7202.
- (7) Criswell, J.; Potter, K.; Shephard, F.; Beale, M. B.; Peters, R. J. *Org. Lett.* **2012**, *14*, 5828-5831.
- (8) Ohsaki, A.; Lu, Y.; Ito, S.; Edatsugi, H.; Iwata, D.; Komoda, Y. *Bioorg Med Chem Lett* **1994**, *4*, 2889-2892.
- (9) Misra, R.; Pandey, R. C.; Dev, S. *Tetrahedron* **1979**, *35*, 985-987.
- (10) Hubert, T.; Wiemer, D. *Phytochemistry* **1985**, *24*, 1197-1198.
- (11) Monti, H.; Tiliacos, N.; Faure, R. *Phytochemistry* **1999**, *51*, 1013-1015.
- (12) Zhou, K.; Peters, R. J. *Phytochemistry* **2009**, *70*, 366-369.
- (13) Mann, F. M.; Prisic, S.; Davenport, E. K.; Determan, M. K.; Coates, R. M.; Peters, R. J. *J. Biol. Chem.* **2010**, *285*, 20558-20563.
- (14) Koksall, M.; Potter, K.; Peters, R. J.; Christianson, D. W. *Biochimica et biophysica acta* **2014**, *1840*, 184-190.
- (15) Glasoe, P.; Long, F. J. *Phys. Chem* **1960**, *64*, 188-189.
- (12) Gaussian 03, Revision D.01, M. J. Frisch, G. W. Trucks, H. B. Schlegel, G. E. Scuseria, M. A. Robb, J. R. Cheeseman, J. A. Montgomery, Jr., T. Vreven, K. N. Kudin, J. C. Burant, J. M. Millam, S. S. Iyengar, J. Tomasi, V. Barone, B. Mennucci, M. Cossi, G. Scalmani, N. Rega, G. A. Petersson, H. Nakatsuji, M. Hada, M. Ehara, K. Toyota, R. Fukuda, J. Hasegawa, M. Ishida, T. Nakajima, Y. Honda, O. Kitao, H. Nakai, M. Klene, X. Li, J. E. Knox, H. P. Hratchian, J. B. Cross, V. Bakken, C. Adamo, J. Jaramillo, R. Gomperts, R. E. Stratmann, O. Yazyev, A. J. Austin, R. Cammi, C. Pomelli, J. W. Ochterski, P. Y. Ayala, K. Morokuma, G. A. Voth, P. Salvador, J. J. Dannenberg, V. G. Zakrzewski, S. Dapprich, A. D. Daniels, M. C. Strain, O. Farkas, D. K. Malick, A. D. Rabuck, K. Raghavachari, J. B. Foresman, J. V. Ortiz, Q. Cui, A. G. Baboul, S. Clifford, J. Cioslowski, B. B. Stefanov, G. Liu, A. Liashenko, P. Piskorz, I. Komaromi, R. L. Martin, D. J. Fox, T. Keith, M. A. Al-Laham, C. Y. Peng, A. Nanayakkara, M. Challacombe, P. M. W. Gill, B. Johnson, W. Chen, M. W. Wong, C. Gonzalez, and J. A. Pople, Gaussian, Inc., Wallingford CT, **2004**.

- (13) Gaussian 09, Revision D.01, M. J. Frisch, G. W. Trucks, H. B. Schlegel, G. E. Scuseria, M. A. Robb, J. R. Cheeseman, G. Scalmani, V. Barone, B. Mennucci, G. A. Petersson, H. Nakatsuji, M. Caricato, X. Li, H. P. Hratchian, A. F. Izmaylov, J. Bloino, G. Zheng, J. L. Sonnenberg, M. Hada, M. Ehara, K. Toyota, R. Fukuda, J. Hasegawa, M. Ishida, T. Nakajima, Y. Honda, O. Kitao, H. Nakai, T. Vreven, J. A. Montgomery, Jr., J. E. Peralta, F. Ogliaro, M. Bearpark, J. J. Heyd, E. Brothers, K. N. Kudin, V. N. Staroverov, T. Keith, R. Kobayashi, J. Normand, K. Raghavachari, A. Rendell, J. C. Burant, S. S. Iyengar, J. Tomasi, M. Cossi, N. Rega, J. M. Millam, M. Klene, J. E. Knox, J. B. Cross, V. Bakken, C. Adamo, J. Jaramillo, R. Gomperts, R. E. Stratmann, O. Yazyev, A. J. Austin, R. Cammi, C. Pomelli, J. W. Ochterski, R. L. Martin, K. Morokuma, V. G. Zakrzewski, G. A. Voth, P. Salvador, J. J. Dannenberg, S. Dapprich, A. D. Daniels, O. Farkas, J. B. Foresman, J. V. Ortiz, J. Cioslowski, and D. J. Fox, Gaussian, Inc., Wallingford CT, **2013**.
- (14) (a) A. D. Becke. *J. Chem. Phys.* **1993**, *98*, 1372-1377. (b) A. D. Becke. *J. Chem. Phys.* **1993**, *98*, 5648-5652. (c) C. Lee, W. Yang, R. G. Parr. *Phys. Rev. B.* **1988**, *37*, 785-789. (d) P. J. Stephens, F. J. Devlin, C. F. Chabalowski, M. J. Frisch. *J. Phys. Chem.* **1994**, *98*, 11623-11627. € J. Tirado-Rives, W. L. Jorgensen. *J. Chem. Theory Comput.* **2008**, *4*, 297-306.
- (15) (a) C. Gonzalez, H. B. Schlegel. *J. Phys. Chem.* **1990**, *94*, 5523-5527. (b) K. Fukui. *Acc. Chem. Res.* **1981**, *14*, 363-368.
- (16) S. P. T. Matsuda, W. K. Wilson, Q. Xiong. *Org. Biomol. Chem.* **2006**, *4*, 530-543.
- (17) D. J. Tantillo. *Nat. Prod. Rep.* **2011**, *28*, 1035-1053. This is part 9 of our series on theoretical studies of diterpene-forming carbocation rearrangements. For part 7 and 8, see refs. Y. J. Hong, D. J. Tantillo. *Nature Chem.* **2014**, *6*, 104-111 and J. Zi, Y. Matsuba, Y. J. Hong, A. J. Jackson, D. J. Tantillo, E. Pichersky, R. J. Peters. *J. Am. Chem. Soc.* **2014**, *136*, 16951-16953.
- (18) N. Muller, A. Falk. *Ball & Stick 4.0a12, molecular graphics software for MacOS*, Johannes Kepler University Linz, **2004**.

### **Coordinates and Energies**

#### Figure 2

#### **A**

B3LYP/6-31+G(d,p)//B3LYP/6-31+G(d,p):  
 HF = -1425.9572778 hartrees (-894802.451392278 kcal/mol)  
 Imaginary Frequencies: none found  
 Zero-point correction = 0.538541 (Hartree/Particle)

mPW1PW91/6-31+G(d,p)//B3LYP/6-31+G(d,p):  
 HF = -1425.7068213 hartrees (-894645.287433963 kcal/mol)

Coordinates (from last standard orientation):

| Center<br>Number | Atomic<br>Number | Coordinates (Angstroms) |           |           |
|------------------|------------------|-------------------------|-----------|-----------|
|                  |                  | X                       | Y         | Z         |
| 1                | 6                | 5.475239                | -0.510321 | -0.382385 |
| 2                | 6                | 4.210632                | 0.295590  | 0.123653  |
| 3                | 6                | 2.831473                | -0.320201 | -0.260306 |
| 4                | 6                | 2.761327                | -1.786969 | 0.213246  |
| 5                | 6                | 3.952230                | -2.601885 | -0.333596 |

|    |    |           |           |           |
|----|----|-----------|-----------|-----------|
| 6  | 6  | 5.294158  | -1.984110 | 0.061107  |
| 7  | 1  | 4.271873  | 0.193912  | 1.217345  |
| 8  | 1  | 2.785463  | -1.824895 | 1.309821  |
| 9  | 1  | 1.826072  | -2.251781 | -0.110690 |
| 10 | 1  | 3.875320  | -3.617736 | 0.069765  |
| 11 | 1  | 3.876975  | -2.706763 | -1.421439 |
| 12 | 1  | 5.399816  | -2.037462 | 1.153939  |
| 13 | 1  | 6.115809  | -2.579167 | -0.354507 |
| 14 | 6  | 1.673559  | 0.524957  | 0.720294  |
| 15 | 6  | 4.269600  | 1.793185  | -0.176515 |
| 16 | 1  | 5.202478  | 2.240905  | 0.170688  |
| 17 | 1  | 4.193240  | 2.002901  | -1.247250 |
| 18 | 6  | 3.113297  | 2.557838  | 0.585130  |
| 19 | 6  | 1.858196  | 1.871263  | 0.236281  |
| 20 | 6  | 5.724562  | -0.421029 | -1.903102 |
| 21 | 1  | 5.794794  | 0.615792  | -2.247508 |
| 22 | 1  | 6.681041  | -0.898800 | -2.138141 |
| 23 | 1  | 4.963174  | -0.922849 | -2.502364 |
| 24 | 6  | 6.730676  | 0.042371  | 0.331794  |
| 25 | 1  | 6.585982  | 0.111522  | 1.416053  |
| 26 | 1  | 7.577400  | -0.628951 | 0.156802  |
| 27 | 1  | 7.025118  | 1.028219  | -0.041018 |
| 28 | 6  | 2.417691  | -0.213351 | -1.735963 |
| 29 | 1  | 2.924583  | -0.974000 | -2.329647 |
| 30 | 1  | 1.346150  | -0.395456 | -1.853382 |
| 31 | 1  | 2.649662  | 0.753736  | -2.188539 |
| 32 | 1  | 2.134596  | 0.409631  | 1.705252  |
| 33 | 6  | 0.265292  | -0.079339 | 0.717718  |
| 34 | 1  | -0.201971 | -0.020998 | -0.269692 |
| 35 | 1  | 0.347455  | -1.141536 | 0.955044  |
| 36 | 6  | -0.663544 | 0.594481  | 1.758241  |
| 37 | 1  | -0.761286 | 1.662718  | 1.531608  |
| 38 | 1  | -0.197625 | 0.523213  | 2.751040  |
| 39 | 6  | -2.044130 | -0.039131 | 1.792373  |
| 40 | 6  | -2.141874 | -1.342544 | 2.547870  |
| 41 | 1  | -3.101866 | -1.843330 | 2.417451  |
| 42 | 1  | -1.360865 | -2.045780 | 2.234201  |
| 43 | 1  | -1.998470 | -1.171858 | 3.622633  |
| 44 | 6  | -3.064007 | 0.580552  | 1.175366  |
| 45 | 6  | -4.485273 | 0.125313  | 1.073873  |
| 46 | 1  | -2.874096 | 1.533246  | 0.680992  |
| 47 | 1  | -5.158384 | 0.863236  | 1.526837  |
| 48 | 1  | 3.317976  | 2.478160  | 1.657717  |
| 49 | 1  | 3.109248  | 3.609193  | 0.288616  |
| 50 | 1  | -4.660740 | -0.845306 | 1.542199  |
| 51 | 8  | -6.146490 | -0.290680 | -2.386591 |
| 52 | 15 | -6.332698 | -0.109096 | -0.797861 |
| 53 | 8  | -7.276071 | 0.958773  | -0.388379 |

|    |   |           |           |           |
|----|---|-----------|-----------|-----------|
| 54 | 8 | -4.797806 | 0.021347  | -0.344916 |
| 55 | 8 | -6.686871 | -1.587746 | -0.248596 |
| 56 | 1 | -6.633976 | 0.392234  | -2.870903 |
| 57 | 1 | -7.640243 | -1.717805 | -0.134340 |
| 58 | 6 | 0.942874  | 2.536766  | -0.713724 |
| 59 | 1 | 1.496044  | 3.099536  | -1.474169 |
| 60 | 1 | 0.199383  | 1.884705  | -1.168733 |
| 61 | 1 | 0.406374  | 3.303888  | -0.128034 |

-----

**TS (A-B1)**

B3LYP/6-31+G(d,p)//B3LYP/6-31+G(d,p):

HF = -1425.9430744 hartrees (-894793.538616744 kcal/mol)

Imaginary Frequencies: 1 (-424.0239 1/cm)

Zero-point correction = 0.535873 (Hartree/Particle)

mPW1PW91/6-31+G(d,p)//B3LYP/6-31+G(d,p):

HF = -1425.6960546 hartrees (-894638.531222046 kcal/mol)

Coordinates (from last standard orientation):

-----

| Center<br>Number | Atomic<br>Number | Coordinates (Angstroms) |           |           |
|------------------|------------------|-------------------------|-----------|-----------|
|                  |                  | X                       | Y         | Z         |
| 1                | 6                | -5.518509               | -0.107884 | -0.288509 |
| 2                | 6                | -4.096396               | 0.562523  | -0.255108 |
| 3                | 6                | -2.956924               | -0.227243 | 0.485386  |
| 4                | 6                | -2.926946               | -1.681308 | -0.061840 |
| 5                | 6                | -4.296765               | -2.366715 | 0.024828  |
| 6                | 6                | -5.360458               | -1.580383 | -0.744748 |
| 7                | 1                | -3.788804               | 0.550169  | -1.316536 |
| 8                | 1                | -2.620833               | -1.658187 | -1.117169 |
| 9                | 1                | -2.182055               | -2.279616 | 0.472795  |
| 10               | 1                | -4.210100               | -3.375947 | -0.392118 |
| 11               | 1                | -4.591339               | -2.501825 | 1.071711  |
| 12               | 1                | -5.097267               | -1.590999 | -1.812258 |
| 13               | 1                | -6.331524               | -2.082513 | -0.665882 |
| 14               | 6                | -1.598477               | 0.469129  | 0.246064  |
| 15               | 6                | -4.096889               | 2.035084  | 0.182843  |
| 16               | 1                | -4.911039               | 2.582813  | -0.295442 |
| 17               | 1                | -4.264453               | 2.118801  | 1.260370  |
| 18               | 6                | -2.776245               | 2.712883  | -0.191812 |
| 19               | 6                | -1.537562               | 1.857257  | -0.050522 |
| 20               | 6                | -6.293587               | -0.035351 | 1.046850  |
| 21               | 1                | -6.326847               | 0.982181  | 1.448983  |
| 22               | 1                | -7.329593               | -0.346099 | 0.877702  |
| 23               | 1                | -5.892487               | -0.690286 | 1.823027  |
| 24               | 6                | -6.374156               | 0.615378  | -1.356238 |

|    |    |           |           |           |
|----|----|-----------|-----------|-----------|
| 25 | 1  | -5.849885 | 0.687733  | -2.316430 |
| 26 | 1  | -7.298110 | 0.054564  | -1.529507 |
| 27 | 1  | -6.668514 | 1.623468  | -1.048771 |
| 28 | 6  | -3.080809 | -0.243483 | 2.037996  |
| 29 | 1  | -3.985801 | -0.764298 | 2.343851  |
| 30 | 1  | -2.238345 | -0.771204 | 2.493818  |
| 31 | 1  | -3.114392 | 0.760957  | 2.466862  |
| 32 | 1  | -1.578178 | 0.891564  | -0.987287 |
| 33 | 6  | -0.301431 | -0.290141 | 0.508016  |
| 34 | 1  | 0.394324  | 0.357264  | 1.048353  |
| 35 | 1  | -0.534244 | -1.122500 | 1.172839  |
| 36 | 6  | 0.407136  | -0.841209 | -0.767093 |
| 37 | 1  | 0.476217  | -0.048353 | -1.521770 |
| 38 | 1  | -0.208806 | -1.638613 | -1.199668 |
| 39 | 6  | 1.802640  | -1.358515 | -0.465457 |
| 40 | 6  | 1.869483  | -2.650302 | 0.311548  |
| 41 | 1  | 2.890077  | -2.948604 | 0.552011  |
| 42 | 1  | 1.320980  | -2.579755 | 1.258877  |
| 43 | 1  | 1.410900  | -3.466155 | -0.261602 |
| 44 | 6  | 2.860792  | -0.657382 | -0.905338 |
| 45 | 6  | 4.312824  | -0.960935 | -0.706496 |
| 46 | 1  | 2.683883  | 0.253528  | -1.477131 |
| 47 | 1  | 4.817376  | -1.073003 | -1.673674 |
| 48 | 1  | -2.800249 | 3.091664  | -1.222887 |
| 49 | 1  | -2.589776 | 3.601724  | 0.425158  |
| 50 | 1  | 4.489494  | -1.857920 | -0.109730 |
| 51 | 8  | 6.602758  | 1.661956  | 0.959224  |
| 52 | 15 | 6.482087  | 0.353895  | 0.029603  |
| 53 | 8  | 7.206261  | 0.421872  | -1.261752 |
| 54 | 8  | 4.884078  | 0.181864  | -0.010134 |
| 55 | 8  | 6.892478  | -0.879596 | 0.989009  |
| 56 | 1  | 7.086587  | 2.367218  | 0.504013  |
| 57 | 1  | 7.820625  | -1.137022 | 0.882550  |
| 58 | 6  | -0.232361 | 2.606690  | -0.147692 |
| 59 | 1  | -0.026567 | 3.026059  | 0.846153  |
| 60 | 1  | 0.621435  | 1.992689  | -0.429075 |
| 61 | 1  | -0.320749 | 3.444745  | -0.843029 |

**B1**

B3LYP/6-31+G(d,p)//B3LYP/6-31+G(d,p):

HF = -1425.9528954 hartrees (-894799.701392454 kcal/mol)

Imaginary Frequencies: none found

Zero-point correction = 0.538791 (Hartree/Particle)

mPW1PW91/6-31+G(d,p)//B3LYP/6-31+G(d,p):

HF = -1425.7030848 hartrees (-894642.942742848 kcal/mol)

Coordinates (from last standard orientation):

| -----  |        |                         |           |           |  |
|--------|--------|-------------------------|-----------|-----------|--|
| Center | Atomic | Coordinates (Angstroms) |           |           |  |
| Number | Number | X                       | Y         | Z         |  |
| -----  |        |                         |           |           |  |
| 1      | 6      | -5.432926               | -0.005061 | -0.545216 |  |
| 2      | 6      | -3.994057               | 0.609051  | -0.343312 |  |
| 3      | 6      | -2.965742               | -0.246441 | 0.472474  |  |
| 4      | 6      | -2.978835               | -1.732387 | -0.008348 |  |
| 5      | 6      | -4.395234               | -2.315505 | -0.068352 |  |
| 6      | 6      | -5.289411               | -1.482085 | -0.986964 |  |
| 7      | 1      | -3.579056               | 0.618972  | -1.363423 |  |
| 8      | 1      | -2.553604               | -1.772020 | -1.018842 |  |
| 9      | 1      | -2.345430               | -2.350185 | 0.635439  |  |
| 10     | 1      | -4.325435               | -3.342443 | -0.443797 |  |
| 11     | 1      | -4.824708               | -2.392713 | 0.936927  |  |
| 12     | 1      | -4.872335               | -1.511695 | -2.003917 |  |
| 13     | 1      | -6.286830               | -1.931287 | -1.052187 |  |
| 14     | 6      | -1.595572               | 0.344201  | 0.405950  |  |
| 15     | 6      | -4.016052               | 2.074275  | 0.142956  |  |
| 16     | 1      | -4.520406               | 2.682474  | -0.610648 |  |
| 17     | 1      | -4.616175               | 2.159096  | 1.052221  |  |
| 18     | 6      | -2.609045               | 2.650753  | 0.409838  |  |
| 19     | 6      | -1.437212               | 1.740329  | -0.064472 |  |
| 20     | 6      | -6.363242               | 0.083180  | 0.687129  |  |
| 21     | 1      | -6.462565               | 1.105136  | 1.063605  |  |
| 22     | 1      | -7.366405               | -0.246597 | 0.398323  |  |
| 23     | 1      | -6.055820               | -0.553138 | 1.520189  |  |
| 24     | 6      | -6.126255               | 0.762248  | -1.696167 |  |
| 25     | 1      | -5.496379               | 0.803683  | -2.592409 |  |
| 26     | 1      | -7.055959               | 0.254409  | -1.971949 |  |
| 27     | 1      | -6.391587               | 1.785848  | -1.415824 |  |
| 28     | 6      | -3.216674               | -0.199507 | 2.038649  |  |
| 29     | 1      | -4.225473               | -0.567807 | 2.219801  |  |
| 30     | 1      | -2.516247               | -0.844187 | 2.572246  |  |
| 31     | 1      | -3.153142               | 0.808005  | 2.453750  |  |
| 32     | 1      | -1.598820               | 1.601612  | -1.157300 |  |
| 33     | 6      | -0.405002               | -0.433596 | 0.785139  |  |
| 34     | 1      | 0.308532                | 0.208910  | 1.307087  |  |
| 35     | 1      | -0.654866               | -1.287731 | 1.413622  |  |
| 36     | 6      | 0.341315                | -0.988255 | -0.520304 |  |
| 37     | 1      | 0.365417                | -0.216065 | -1.292517 |  |
| 38     | 1      | -0.251209               | -1.824312 | -0.902515 |  |
| 39     | 6      | 1.748985                | -1.432908 | -0.187871 |  |
| 40     | 6      | 1.865766                | -2.633025 | 0.718328  |  |
| 41     | 1      | 2.900149                | -2.914944 | 0.914930  |  |
| 42     | 1      | 1.392016                | -2.448830 | 1.690814  |  |
| 43     | 1      | 1.362796                | -3.502243 | 0.276323  |  |

|    |    |           |           |           |
|----|----|-----------|-----------|-----------|
| 44 | 6  | 2.777303  | -0.755693 | -0.728300 |
| 45 | 6  | 4.241206  | -1.026959 | -0.568611 |
| 46 | 1  | 2.564426  | 0.097286  | -1.371686 |
| 47 | 1  | 4.688040  | -1.289283 | -1.535646 |
| 48 | 1  | -2.481027 | 3.612899  | -0.092245 |
| 49 | 1  | -2.454600 | 2.844328  | 1.476762  |
| 50 | 1  | 4.457609  | -1.822585 | 0.147388  |
| 51 | 8  | 6.606310  | 1.832515  | 0.497116  |
| 52 | 15 | 6.438200  | 0.376598  | -0.163877 |
| 53 | 8  | 7.087773  | 0.189618  | -1.482277 |
| 54 | 8  | 4.838116  | 0.207547  | -0.093375 |
| 55 | 8  | 6.894583  | -0.651517 | 0.993965  |
| 56 | 1  | 7.001790  | 2.458644  | -0.127746 |
| 57 | 1  | 7.824816  | -0.911565 | 0.914821  |
| 58 | 6  | -0.075957 | 2.417488  | 0.142277  |
| 59 | 1  | 0.123169  | 2.584842  | 1.206103  |
| 60 | 1  | 0.758180  | 1.852659  | -0.277619 |
| 61 | 1  | -0.086269 | 3.395943  | -0.344295 |

**B2**

B3LYP/6-31+G(d,p)//B3LYP/6-31+G(d,p):

HF = -1425.95499 hartrees (-894801.0157749 kcal/mol)

Imaginary Frequencies: none found

Zero-point correction = 0.539811 (Hartree/Particle)

mPW1PW91/6-31+G(d,p)//B3LYP/6-31+G(d,p):

HF = -1425.7050096 hartrees (-894644.150574096 kcal/mol)

Coordinates (from last standard orientation):

| Center<br>Number | Atomic<br>Number | Coordinates (Angstroms) |           |           |
|------------------|------------------|-------------------------|-----------|-----------|
|                  |                  | X                       | Y         | Z         |
| 1                | 6                | 4.974454                | -0.016384 | -1.053314 |
| 2                | 6                | 3.572789                | -0.564546 | -0.603780 |
| 3                | 6                | 2.831200                | 0.282320  | 0.505059  |
| 4                | 6                | 2.795175                | 1.780977  | 0.096143  |
| 5                | 6                | 4.184219                | 2.321104  | -0.273690 |
| 6                | 6                | 4.834940                | 1.490972  | -1.382049 |
| 7                | 1                | 2.938148                | -0.426910 | -1.493981 |
| 8                | 1                | 2.143436                | 1.893422  | -0.778042 |
| 9                | 1                | 2.369491                | 2.392800  | 0.898371  |
| 10               | 1                | 4.070682                | 3.359290  | -0.604293 |
| 11               | 1                | 4.833432                | 2.365271  | 0.608949  |
| 12               | 1                | 4.232987                | 1.594412  | -2.296153 |
| 13               | 1                | 5.824480                | 1.897207  | -1.620486 |
| 14               | 6                | 1.500014                | -0.297502 | 0.835799  |



|    |    |           |           |           |
|----|----|-----------|-----------|-----------|
| 15 | 6  | 3.533050  | -2.066529 | -0.282502 |
| 16 | 1  | 4.044219  | -2.625907 | -1.069301 |
| 17 | 1  | 4.073912  | -2.291524 | 0.643631  |
| 18 | 6  | 2.087015  | -2.558101 | -0.197546 |
| 19 | 6  | 1.249854  | -1.770296 | 0.832002  |
| 20 | 6  | 6.100471  | -0.250400 | -0.021830 |
| 21 | 1  | 6.187760  | -1.307128 | 0.250016  |
| 22 | 1  | 7.059398  | 0.047316  | -0.458105 |
| 23 | 1  | 5.977793  | 0.323557  | 0.898658  |
| 24 | 6  | 5.386927  | -0.731755 | -2.361805 |
| 25 | 1  | 4.589824  | -0.693858 | -3.113287 |
| 26 | 1  | 6.265732  | -0.238883 | -2.790152 |
| 27 | 1  | 5.656363  | -1.779647 | -2.201090 |
| 28 | 6  | 3.480861  | 0.182556  | 1.960422  |
| 29 | 1  | 3.903222  | -0.800272 | 2.155476  |
| 30 | 1  | 2.770951  | 0.423917  | 2.757816  |
| 31 | 1  | 0.180368  | -1.890679 | 0.613934  |
| 32 | 6  | 0.351646  | 0.538247  | 1.217279  |
| 33 | 1  | -0.290629 | 0.004917  | 1.923424  |
| 34 | 1  | 0.644932  | 1.503186  | 1.630824  |
| 35 | 6  | -0.545290 | 0.806899  | -0.083299 |
| 36 | 1  | -0.772957 | -0.148426 | -0.562045 |
| 37 | 1  | 0.033003  | 1.412376  | -0.786450 |
| 38 | 6  | -1.829494 | 1.516317  | 0.290408  |
| 39 | 6  | -1.696880 | 2.959786  | 0.708922  |
| 40 | 1  | -2.659258 | 3.472593  | 0.748702  |
| 41 | 1  | -1.246689 | 3.053871  | 1.706069  |
| 42 | 1  | -1.054392 | 3.510967  | 0.012026  |
| 43 | 6  | -2.978755 | 0.821436  | 0.217856  |
| 44 | 6  | -4.364657 | 1.318334  | 0.514576  |
| 45 | 1  | -2.950439 | -0.224116 | -0.084961 |
| 46 | 1  | -4.435242 | 2.406064  | 0.539138  |
| 47 | 1  | 1.617126  | -2.457908 | -1.183428 |
| 48 | 1  | 2.044527  | -3.621608 | 0.057993  |
| 49 | 1  | -4.717330 | 0.935099  | 1.480927  |
| 50 | 8  | -6.881860 | -0.533229 | 0.717361  |
| 51 | 15 | -5.880678 | -0.583877 | -0.542656 |
| 52 | 8  | -4.887402 | -1.689827 | -0.536467 |
| 53 | 8  | -5.289428 | 0.909846  | -0.525571 |
| 54 | 8  | -6.858824 | -0.533145 | -1.812182 |
| 55 | 1  | -7.189399 | -1.408684 | 0.996354  |
| 56 | 1  | -6.499354 | -1.009988 | -2.574804 |
| 57 | 6  | 1.414951  | -2.351367 | 2.282180  |
| 58 | 1  | 2.465596  | -2.447187 | 2.558033  |
| 59 | 1  | 0.904048  | -1.748857 | 3.037124  |
| 60 | 1  | 0.966333  | -3.347193 | 2.280939  |
| 61 | 1  | 4.273259  | 0.929090  | 2.007903  |

**TS (B2-C)**

B3LYP/6-31+G(d,p)//B3LYP/6-31+G(d,p):

HF = -1425.9485294 hartrees (-894796.961683794 kcal/mol)

Imaginary Frequencies: 1 (-286.3529 1/cm)

Zero-point correction = 0.539434 (Hartree/Particle)

mPW1PW91/6-31+G(d,p)//B3LYP/6-31+G(d,p):

HF = -1425.7017119 hartrees (-894642.081234369 kcal/mol)

Coordinates (from last standard orientation):

```
-----
```

| Center<br>Number | Atomic<br>Number | Coordinates (Angstroms) |           |           |
|------------------|------------------|-------------------------|-----------|-----------|
|                  |                  | X                       | Y         | Z         |
| 1                | 6                | 5.163253                | -0.032340 | -0.840427 |
| 2                | 6                | 3.698426                | -0.588533 | -0.680705 |
| 3                | 6                | 2.722571                | 0.311385  | 0.094992  |
| 4                | 6                | 2.781742                | 1.776987  | -0.316207 |
| 5                | 6                | 4.210666                | 2.328604  | -0.406681 |
| 6                | 6                | 5.088976                | 1.446435  | -1.297004 |
| 7                | 1                | 3.270474                | -0.510853 | -1.695814 |
| 8                | 1                | 2.326046                | 1.809480  | -1.316025 |
| 9                | 1                | 2.158660                | 2.403252  | 0.324731  |
| 10               | 1                | 4.166731                | 3.345496  | -0.809284 |
| 11               | 1                | 4.643551                | 2.420950  | 0.597140  |
| 12               | 1                | 4.699403                | 1.481814  | -2.324112 |
| 13               | 1                | 6.104729                | 1.854783  | -1.340878 |
| 14               | 6                | 1.581778                | -0.229420 | 0.749289  |
| 15               | 6                | 3.587802                | -2.069033 | -0.288155 |
| 16               | 1                | 4.147620                | -2.672263 | -1.006014 |
| 17               | 1                | 4.051194                | -2.259042 | 0.687864  |
| 18               | 6                | 2.125080                | -2.514912 | -0.279456 |
| 19               | 6                | 1.280112                | -1.740219 | 0.749762  |
| 20               | 6                | 6.017294                | -0.147146 | 0.442215  |
| 21               | 1                | 6.056007                | -1.173708 | 0.820501  |
| 22               | 1                | 7.047555                | 0.145247  | 0.215990  |
| 23               | 1                | 5.678529                | 0.504715  | 1.252243  |
| 24               | 6                | 5.873625                | -0.833789 | -1.954202 |
| 25               | 1                | 5.276002                | -0.869140 | -2.872300 |
| 26               | 1                | 6.827235                | -0.356378 | -2.200563 |
| 27               | 1                | 6.097948                | -1.860640 | -1.651992 |
| 28               | 6                | 2.974136                | 0.173332  | 1.916331  |
| 29               | 1                | 3.826348                | -0.495516 | 1.942651  |
| 30               | 1                | 2.271486                | -0.138117 | 2.690868  |
| 31               | 1                | 0.233839                | -1.778199 | 0.422736  |
| 32               | 6                | 0.388792                | 0.634063  | 1.136181  |
| 33               | 1                | -0.167516               | 0.117969  | 1.925623  |

```
-----
```

|    |    |           |           |           |
|----|----|-----------|-----------|-----------|
| 34 | 1  | 0.703943  | 1.596480  | 1.545564  |
| 35 | 6  | -0.565250 | 0.866123  | -0.070555 |
| 36 | 1  | -0.780113 | -0.089812 | -0.558393 |
| 37 | 1  | -0.059989 | 1.498317  | -0.811937 |
| 38 | 6  | -1.876531 | 1.515858  | 0.338433  |
| 39 | 6  | -1.791305 | 2.962674  | 0.762629  |
| 40 | 1  | -2.771443 | 3.430275  | 0.867972  |
| 41 | 1  | -1.278745 | 3.074629  | 1.727202  |
| 42 | 1  | -1.223318 | 3.547306  | 0.028205  |
| 43 | 6  | -2.999409 | 0.779682  | 0.294250  |
| 44 | 6  | -4.390552 | 1.208777  | 0.657962  |
| 45 | 1  | -2.939615 | -0.255780 | -0.037420 |
| 46 | 1  | -4.486339 | 2.284576  | 0.804804  |
| 47 | 1  | 1.703190  | -2.368866 | -1.281705 |
| 48 | 1  | 2.050006  | -3.586146 | -0.068747 |
| 49 | 1  | -4.728439 | 0.710636  | 1.575025  |
| 50 | 8  | -6.925553 | -0.640370 | 0.689134  |
| 51 | 15 | -5.917082 | -0.583164 | -0.566640 |
| 52 | 8  | -4.937166 | -1.697319 | -0.655519 |
| 53 | 8  | -5.320031 | 0.898317  | -0.417696 |
| 54 | 8  | -6.891533 | -0.415753 | -1.831387 |
| 55 | 1  | -7.222163 | -1.539569 | 0.894263  |
| 56 | 1  | -6.531628 | -0.833546 | -2.627557 |
| 57 | 6  | 1.306721  | -2.399783 | 2.145105  |
| 58 | 1  | 2.326846  | -2.535657 | 2.517546  |
| 59 | 1  | 0.736585  | -1.833916 | 2.889227  |
| 60 | 1  | 0.848990  | -3.389751 | 2.077179  |
| 61 | 1  | 3.219317  | 1.216960  | 2.096203  |

### C

B3LYP/6-31+G(d,p)//B3LYP/6-31+G(d,p):

HF = -1425.9565209 hartrees (-894801.976429959 kcal/mol)

Imaginary Frequencies: none found

Zero-point correction = 0.539085 (Hartree/Particle)

mPW1PW91/6-31+G(d,p)//B3LYP/6-31+G(d,p):

HF = -1425.7077731 hartrees (-894645.884697981 kcal/mol)

Coordinates (from last standard orientation):

| Center<br>Number | Atomic<br>Number | Coordinates (Angstroms) |           |           |
|------------------|------------------|-------------------------|-----------|-----------|
|                  |                  | X                       | Y         | Z         |
| 1                | 6                | 5.147733                | -0.046203 | -0.838009 |
| 2                | 6                | 3.658914                | -0.592974 | -0.714865 |
| 3                | 6                | 2.687733                | 0.312215  | -0.038755 |
| 4                | 6                | 2.781549                | 1.763863  | -0.354525 |

|    |    |           |           |           |
|----|----|-----------|-----------|-----------|
| 5  | 6  | 4.216461  | 2.320614  | -0.466319 |
| 6  | 6  | 5.099820  | 1.419567  | -1.325600 |
| 7  | 1  | 3.270570  | -0.498015 | -1.753241 |
| 8  | 1  | 2.301689  | 1.838889  | -1.347286 |
| 9  | 1  | 2.162687  | 2.362115  | 0.314284  |
| 10 | 1  | 4.159809  | 3.326544  | -0.892169 |
| 11 | 1  | 4.633928  | 2.435313  | 0.539870  |
| 12 | 1  | 4.741387  | 1.441898  | -2.364133 |
| 13 | 1  | 6.121208  | 1.815469  | -1.345749 |
| 14 | 6  | 1.679611  | -0.189642 | 0.913204  |
| 15 | 6  | 3.505816  | -2.072552 | -0.336366 |
| 16 | 1  | 4.050366  | -2.682578 | -1.059828 |
| 17 | 1  | 3.958654  | -2.274989 | 0.640512  |
| 18 | 6  | 2.027236  | -2.456759 | -0.333231 |
| 19 | 6  | 1.220327  | -1.692736 | 0.734972  |
| 20 | 6  | 5.895168  | -0.147660 | 0.507691  |
| 21 | 1  | 5.955342  | -1.180049 | 0.863391  |
| 22 | 1  | 6.922900  | 0.206776  | 0.379013  |
| 23 | 1  | 5.439161  | 0.456089  | 1.297702  |
| 24 | 6  | 5.902188  | -0.883551 | -1.890196 |
| 25 | 1  | 5.367868  | -0.912188 | -2.846617 |
| 26 | 1  | 6.884326  | -0.436777 | -2.074032 |
| 27 | 1  | 6.073969  | -1.911741 | -1.561623 |
| 28 | 6  | 2.641595  | -0.004145 | 2.194385  |
| 29 | 1  | 3.489587  | -0.686073 | 2.205175  |
| 30 | 1  | 1.999484  | -0.230377 | 3.048671  |
| 31 | 1  | 0.194926  | -1.618604 | 0.361276  |
| 32 | 6  | 0.434553  | 0.709009  | 1.164952  |
| 33 | 1  | -0.147922 | 0.196043  | 1.938630  |
| 34 | 1  | 0.729523  | 1.665534  | 1.608762  |
| 35 | 6  | -0.483802 | 0.953534  | -0.054558 |
| 36 | 1  | -0.675543 | 0.007003  | -0.570429 |
| 37 | 1  | 0.020155  | 1.610783  | -0.776246 |
| 38 | 6  | -1.815187 | 1.578980  | 0.329554  |
| 39 | 6  | -1.764043 | 3.028573  | 0.750781  |
| 40 | 1  | -2.753791 | 3.475107  | 0.857715  |
| 41 | 1  | -1.250149 | 3.153061  | 1.712893  |
| 42 | 1  | -1.210845 | 3.624289  | 0.013664  |
| 43 | 6  | -2.923682 | 0.821280  | 0.280656  |
| 44 | 6  | -4.323477 | 1.222779  | 0.640860  |
| 45 | 1  | -2.840973 | -0.213843 | -0.047397 |
| 46 | 1  | -4.440692 | 2.296246  | 0.789008  |
| 47 | 1  | 1.610276  | -2.254052 | -1.328935 |
| 48 | 1  | 1.913816  | -3.532856 | -0.171420 |
| 49 | 1  | -4.655212 | 0.716868  | 1.555835  |
| 50 | 8  | -6.821149 | -0.664266 | 0.681794  |
| 51 | 15 | -5.824670 | -0.591423 | -0.583509 |
| 52 | 8  | -4.835105 | -1.695980 | -0.684277 |

|    |   |           |           |           |
|----|---|-----------|-----------|-----------|
| 53 | 8 | -5.245826 | 0.896546  | -0.437734 |
| 54 | 8 | -6.811907 | -0.432955 | -1.840290 |
| 55 | 1 | -7.096400 | -1.568995 | 0.892101  |
| 56 | 1 | -6.458734 | -0.858377 | -2.635348 |
| 57 | 6 | 1.132938  | -2.483149 | 2.051711  |
| 58 | 1 | 2.115958  | -2.724893 | 2.468826  |
| 59 | 1 | 0.554218  | -1.959752 | 2.819205  |
| 60 | 1 | 0.619647  | -3.429535 | 1.859489  |
| 61 | 1 | 2.992045  | 1.024011  | 2.307069  |

-----

**TS (C-D)**

B3LYP/6-31+G(d,p)//B3LYP/6-31+G(d,p):

HF = -1425.9446071 hartrees (-894794.500401321 kcal/mol)

Imaginary Frequencies: 1 (-314.3217 1/cm)

Zero-point correction = 0.536942 (Hartree/Particle)

mPW1PW91/6-31+G(d,p)//B3LYP/6-31+G(d,p):

HF = -1425.6981281 hartrees (-894639.832364031 kcal/mol)

Coordinates (from last standard orientation):

-----

| Center<br>Number | Atomic<br>Number | Coordinates (Angstroms) |           |           |
|------------------|------------------|-------------------------|-----------|-----------|
|                  |                  | X                       | Y         | Z         |
| 1                | 6                | 4.506978                | -0.353381 | 1.496115  |
| 2                | 6                | 3.426986                | 0.361746  | 0.664086  |
| 3                | 6                | 2.818233                | -0.229386 | -0.482705 |
| 4                | 6                | 3.187664                | -1.658528 | -0.891602 |
| 5                | 6                | 4.517186                | -2.155346 | -0.323441 |
| 6                | 6                | 4.589175                | -1.862148 | 1.170308  |
| 7                | 1                | 2.262974                | -0.339950 | 0.673725  |
| 8                | 1                | 2.372912                | -2.323509 | -0.578070 |
| 9                | 1                | 3.198433                | -1.708625 | -1.979589 |
| 10               | 1                | 4.606861                | -3.229737 | -0.508766 |
| 11               | 1                | 5.350850                | -1.679972 | -0.852653 |
| 12               | 1                | 3.768423                | -2.384267 | 1.682374  |
| 13               | 1                | 5.515441                | -2.253749 | 1.602103  |
| 14               | 6                | 1.851083                | 0.538208  | -1.428946 |
| 15               | 6                | 3.042017                | 1.766610  | 1.065682  |
| 16               | 1                | 3.107767                | 1.872929  | 2.148998  |
| 17               | 1                | 3.809130                | 2.430837  | 0.647552  |
| 18               | 6                | 1.654010                | 2.164522  | 0.565587  |
| 19               | 6                | 1.549710                | 2.017252  | -0.960457 |
| 20               | 6                | 5.845292                | 0.354583  | 1.131181  |
| 21               | 1                | 5.838730                | 1.409639  | 1.416366  |
| 22               | 1                | 6.653619                | -0.130928 | 1.685877  |
| 23               | 1                | 6.079627                | 0.286817  | 0.065119  |

|    |    |           |           |           |
|----|----|-----------|-----------|-----------|
| 24 | 6  | 4.259480  | -0.204635 | 3.016337  |
| 25 | 1  | 3.257983  | -0.544968 | 3.302334  |
| 26 | 1  | 4.981479  | -0.830047 | 3.549178  |
| 27 | 1  | 4.396368  | 0.818199  | 3.373990  |
| 28 | 6  | 2.508555  | 0.554906  | -2.840301 |
| 29 | 1  | 3.518739  | 0.972632  | -2.835908 |
| 30 | 1  | 1.895177  | 1.170677  | -3.501523 |
| 31 | 1  | 0.508162  | 2.211788  | -1.241096 |
| 32 | 6  | 0.520393  | -0.275396 | -1.587085 |
| 33 | 1  | -0.075744 | 0.256656  | -2.337046 |
| 34 | 1  | 0.757603  | -1.247809 | -2.031055 |
| 35 | 6  | -0.351929 | -0.485749 | -0.335348 |
| 36 | 1  | -0.630995 | 0.480391  | 0.093217  |
| 37 | 1  | 0.222117  | -1.026977 | 0.437997  |
| 38 | 6  | -1.624011 | -1.272124 | -0.612191 |
| 39 | 6  | -1.440394 | -2.726921 | -0.974703 |
| 40 | 1  | -2.375017 | -3.289393 | -0.951105 |
| 41 | 1  | -1.018288 | -2.846567 | -1.980532 |
| 42 | 1  | -0.747619 | -3.213452 | -0.275865 |
| 43 | 6  | -2.804878 | -0.638497 | -0.515338 |
| 44 | 6  | -4.170824 | -1.209091 | -0.756370 |
| 45 | 1  | -2.815687 | 0.412066  | -0.229393 |
| 46 | 1  | -4.166531 | -2.286635 | -0.918847 |
| 47 | 1  | 0.903424  | 1.553925  | 1.079851  |
| 48 | 1  | 1.451149  | 3.200063  | 0.853402  |
| 49 | 1  | -4.647501 | -0.737761 | -1.624136 |
| 50 | 8  | -6.808877 | 0.434112  | -0.529458 |
| 51 | 15 | -5.736161 | 0.394415  | 0.674208  |
| 52 | 8  | -4.861026 | 1.590370  | 0.788687  |
| 53 | 8  | -5.024784 | -1.017238 | 0.408935  |
| 54 | 8  | -6.620272 | 0.064219  | 1.974303  |
| 55 | 1  | -7.166775 | 1.321151  | -0.683012 |
| 56 | 1  | -6.284795 | 0.516254  | 2.762252  |
| 57 | 6  | 2.394705  | 3.120572  | -1.634626 |
| 58 | 1  | 3.473003  | 2.988753  | -1.493975 |
| 59 | 1  | 2.213289  | 3.189246  | -2.708255 |
| 60 | 1  | 2.124456  | 4.089741  | -1.203984 |
| 61 | 1  | 2.546739  | -0.438532 | -3.289476 |

**D**

B3LYP/6-31+G(d,p)//B3LYP/6-31+G(d,p):

HF = -1425.9508299 hartrees (-894798.405270549 kcal/mol)

Imaginary Frequencies: none found

Zero-point correction = 0.538255 (Hartree/Particle)

mPW1PW91/6-31+G(d,p)//B3LYP/6-31+G(d,p):

HF = -1425.7019277 hartrees (-894642.216651027 kcal/mol)

Coordinates (from last standard orientation):

| Center<br>Number | Atomic<br>Number | Coordinates (Angstroms) |           |           |
|------------------|------------------|-------------------------|-----------|-----------|
|                  |                  | X                       | Y         | Z         |
| 1                | 6                | 4.795403                | -0.466244 | -1.215530 |
| 2                | 6                | 3.607866                | -0.659677 | -0.323153 |
| 3                | 6                | 2.561538                | 0.351428  | -0.125049 |
| 4                | 6                | 2.910685                | 1.806088  | -0.551279 |
| 5                | 6                | 4.400200                | 2.019743  | -0.818567 |
| 6                | 6                | 4.890129                | 0.961817  | -1.802803 |
| 7                | 1                | 1.872985                | -0.072876 | -0.904569 |
| 8                | 1                | 2.349007                | 2.060944  | -1.456049 |
| 9                | 1                | 2.562951                | 2.493031  | 0.221497  |
| 10               | 1                | 4.560824                | 3.023289  | -1.223169 |
| 11               | 1                | 4.969568                | 1.966420  | 0.119430  |
| 12               | 1                | 4.286432                | 1.022122  | -2.717583 |
| 13               | 1                | 5.926238                | 1.141398  | -2.105737 |
| 14               | 6                | 1.737821                | 0.216816  | 1.232181  |
| 15               | 6                | 3.411489                | -1.958613 | 0.353644  |
| 16               | 1                | 3.966551                | -2.763302 | -0.131549 |
| 17               | 1                | 3.891678                | -1.822305 | 1.341093  |
| 18               | 6                | 1.931407                | -2.301114 | 0.570728  |
| 19               | 6                | 1.190527                | -1.254745 | 1.432743  |
| 20               | 6                | 6.078481                | -0.782764 | -0.372317 |
| 21               | 1                | 6.073784                | -1.794883 | 0.036867  |
| 22               | 1                | 6.938695                | -0.693763 | -1.040964 |
| 23               | 1                | 6.209921                | -0.071158 | 0.447188  |
| 24               | 6                | 4.715473                | -1.495873 | -2.390962 |
| 25               | 1                | 3.788025                | -1.387312 | -2.961126 |
| 26               | 1                | 5.548407                | -1.280443 | -3.066135 |
| 27               | 1                | 4.809815                | -2.530638 | -2.056908 |
| 28               | 6                | 2.681664                | 0.666933  | 2.374871  |
| 29               | 1                | 3.516875                | -0.020276 | 2.542588  |
| 30               | 1                | 2.136445                | 0.745049  | 3.317763  |
| 31               | 1                | 0.156479                | -1.251929 | 1.076694  |
| 32               | 6                | 0.512575                | 1.177912  | 1.216815  |
| 33               | 1                | -0.086271               | 0.917299  | 2.098071  |
| 34               | 1                | 0.842667                | 2.208781  | 1.382075  |
| 35               | 6                | -0.394862               | 1.114303  | -0.032127 |
| 36               | 1                | -0.525724               | 0.073232  | -0.349617 |
| 37               | 1                | 0.091632                | 1.643233  | -0.864445 |
| 38               | 6                | -1.774015               | 1.717157  | 0.180440  |
| 39               | 6                | -1.813960               | 3.215461  | 0.360932  |
| 40               | 1                | -2.828054               | 3.618083  | 0.356279  |
| 41               | 1                | -1.349210               | 3.517476  | 1.308332  |
| 42               | 1                | -1.253975               | 3.713970  | -0.440348 |

|    |    |           |           |           |
|----|----|-----------|-----------|-----------|
| 43 | 6  | -2.840557 | 0.900497  | 0.203057  |
| 44 | 6  | -4.276554 | 1.274040  | 0.420147  |
| 45 | 1  | -2.688674 | -0.167469 | 0.054928  |
| 46 | 1  | -4.452316 | 2.349218  | 0.392853  |
| 47 | 1  | 1.458706  | -2.398483 | -0.414302 |
| 48 | 1  | 1.868813  | -3.288232 | 1.036650  |
| 49 | 1  | -4.645359 | 0.894476  | 1.380736  |
| 50 | 8  | -6.622691 | -0.784494 | 0.613582  |
| 51 | 15 | -5.585844 | -0.792274 | -0.621816 |
| 52 | 8  | -4.525346 | -1.832588 | -0.557709 |
| 53 | 8  | -5.116426 | 0.738541  | -0.645578 |
| 54 | 8  | -6.532631 | -0.859233 | -1.918456 |
| 55 | 1  | -6.836809 | -1.675106 | 0.928687  |
| 56 | 1  | -6.124240 | -1.362943 | -2.637547 |
| 57 | 6  | 1.128723  | -1.701499 | 2.904333  |
| 58 | 1  | 2.121106  | -1.848440 | 3.343983  |
| 59 | 1  | 0.589070  | -0.984700 | 3.529610  |
| 60 | 1  | 0.593172  | -2.653126 | 2.971569  |
| 61 | 1  | 3.100996  | 1.655682  | 2.167057  |

-----

**TS (D-E)**

B3LYP/6-31+G(d,p)//B3LYP/6-31+G(d,p):

HF = -1425.9273139 hartrees (-894783.648745389 kcal/mol)

Imaginary Frequencies: 1 (-151.2208 1/cm)

Zero-point correction = 0.538865 (Hartree/Particle)

mPW1PW91/6-31+G(d,p)//B3LYP/6-31+G(d,p):

HF = -1425.6803367 hartrees (-894628.668082617 kcal/mol)

Coordinates (from last standard orientation):

-----

| Center<br>Number | Atomic<br>Number | Coordinates (Angstroms) |           |           |
|------------------|------------------|-------------------------|-----------|-----------|
|                  |                  | X                       | Y         | Z         |
| 1                | 6                | 4.811870                | -0.135719 | -1.369795 |
| 2                | 6                | 3.742142                | -0.577499 | -0.536542 |
| 3                | 6                | 2.672269                | 0.441423  | -0.077668 |
| 4                | 6                | 3.090558                | 1.941283  | -0.142908 |
| 5                | 6                | 4.583807                | 2.196823  | -0.376459 |
| 6                | 6                | 5.123887                | 1.327479  | -1.511944 |
| 7                | 1                | 1.955516                | 0.312440  | -0.896513 |
| 8                | 1                | 2.534061                | 2.416274  | -0.958785 |
| 9                | 1                | 2.782882                | 2.466348  | 0.762595  |
| 10               | 1                | 4.746686                | 3.249813  | -0.622795 |
| 11               | 1                | 5.162129                | 2.008723  | 0.535859  |
| 12               | 1                | 4.642445                | 1.611020  | -2.463378 |
| 13               | 1                | 6.198054                | 1.469730  | -1.672525 |



|    |    |           |           |           |
|----|----|-----------|-----------|-----------|
| 14 | 6  | 1.851927  | 0.025413  | 1.208618  |
| 15 | 6  | 3.127144  | -1.979599 | -0.786642 |
| 16 | 1  | 3.107227  | -2.161808 | -1.866950 |
| 17 | 1  | 3.758853  | -2.761368 | -0.357759 |
| 18 | 6  | 1.695661  | -2.108065 | -0.236319 |
| 19 | 6  | 1.538905  | -1.530956 | 1.182614  |
| 20 | 6  | 5.141679  | -0.720024 | 0.491621  |
| 21 | 1  | 5.392512  | -1.775557 | 0.519134  |
| 22 | 1  | 6.051772  | -0.138922 | 0.317919  |
| 23 | 1  | 4.720260  | -0.348844 | 1.421096  |
| 24 | 6  | 5.563173  | -1.072633 | -2.266451 |
| 25 | 1  | 5.112241  | -0.976270 | -3.264925 |
| 26 | 1  | 6.613492  | -0.786954 | -2.361247 |
| 27 | 1  | 5.487064  | -2.120003 | -1.976353 |
| 28 | 6  | 2.543826  | 0.441130  | 2.529439  |
| 29 | 1  | 3.452892  | -0.117023 | 2.765252  |
| 30 | 1  | 1.863266  | 0.272896  | 3.369306  |
| 31 | 1  | 0.480998  | -1.637632 | 1.449241  |
| 32 | 6  | 0.501966  | 0.822274  | 1.202642  |
| 33 | 1  | -0.038584 | 0.527045  | 2.110323  |
| 34 | 1  | 0.724973  | 1.888553  | 1.327817  |
| 35 | 6  | -0.461196 | 0.652008  | 0.008851  |
| 36 | 1  | -0.694993 | -0.406632 | -0.139257 |
| 37 | 1  | 0.013721  | 1.009860  | -0.917525 |
| 38 | 6  | -1.767841 | 1.410060  | 0.184822  |
| 39 | 6  | -1.661536 | 2.917098  | 0.175767  |
| 40 | 1  | -2.630010 | 3.411567  | 0.085268  |
| 41 | 1  | -1.188588 | 3.295038  | 1.090982  |
| 42 | 1  | -1.040643 | 3.252100  | -0.664901 |
| 43 | 6  | -2.910148 | 0.716255  | 0.325979  |
| 44 | 6  | -4.291893 | 1.265224  | 0.514598  |
| 45 | 1  | -2.870090 | -0.371528 | 0.301166  |
| 46 | 1  | -4.335061 | 2.353041  | 0.470074  |
| 47 | 1  | 0.995689  | -1.623997 | -0.923447 |
| 48 | 1  | 1.424997  | -3.169123 | -0.234983 |
| 49 | 1  | -4.715864 | 0.948509  | 1.474662  |
| 50 | 8  | -6.941605 | -0.391332 | 0.705224  |
| 51 | 15 | -5.880208 | -0.616303 | -0.489674 |
| 52 | 8  | -5.003194 | -1.807273 | -0.344130 |
| 53 | 8  | -5.177776 | 0.820382  | -0.558227 |
| 54 | 8  | -6.783923 | -0.591091 | -1.819827 |
| 55 | 1  | -7.283076 | -1.225449 | 1.060167  |
| 56 | 1  | -6.450440 | -1.206218 | -2.489104 |
| 57 | 6  | 2.305445  | -2.403736 | 2.197560  |
| 58 | 1  | 3.391242  | -2.397758 | 2.052064  |
| 59 | 1  | 2.112696  | -2.100951 | 3.229058  |
| 60 | 1  | 1.974728  | -3.443112 | 2.101199  |
| 61 | 1  | 2.792178  | 1.505812  | 2.541356  |

-----  
**E**

B3LYP/6-31+G(d,p)//B3LYP/6-31+G(d,p):

HF = -1425.9325568 hartrees (-894786.938717568 kcal/mol)

Imaginary Frequencies: none found

Zero-point correction = 0.538940 (Hartree/Particle)

mPW1PW91/6-31+G(d,p)//B3LYP/6-31+G(d,p):

HF = -1425.6832333 hartrees (-894630.485728083 kcal/mol)

Coordinates (from last standard orientation):  
-----

| Center<br>Number | Atomic<br>Number | Coordinates (Angstroms) |           |           |
|------------------|------------------|-------------------------|-----------|-----------|
|                  |                  | X                       | Y         | Z         |
| 1                | 6                | 4.455492                | -0.076492 | -1.640864 |
| 2                | 6                | 3.846246                | -0.544463 | -0.381272 |
| 3                | 6                | 2.752766                | 0.453887  | 0.107990  |
| 4                | 6                | 3.349837                | 1.876031  | 0.182023  |
| 5                | 6                | 3.897205                | 2.331262  | -1.193743 |
| 6                | 6                | 3.973400                | 1.170105  | -2.245299 |
| 7                | 1                | 2.026723                | 0.484016  | -0.711773 |
| 8                | 1                | 2.584932                | 2.579751  | 0.517096  |
| 9                | 1                | 4.147076                | 1.914950  | 0.929804  |
| 10               | 1                | 3.267929                | 3.107584  | -1.635833 |
| 11               | 1                | 4.899612                | 2.757444  | -1.097258 |
| 12               | 1                | 2.940732                | 0.957348  | -2.574782 |
| 13               | 1                | 4.541746                | 1.452058  | -3.134712 |
| 14               | 6                | 1.905388                | -0.001011 | 1.350584  |
| 15               | 6                | 3.156748                | -1.953261 | -0.769939 |
| 16               | 1                | 3.151716                | -2.122227 | -1.852692 |
| 17               | 1                | 3.782561                | -2.739642 | -0.339694 |
| 18               | 6                | 1.708466                | -2.029477 | -0.261154 |
| 19               | 6                | 1.493616                | -1.530901 | 1.181755  |
| 20               | 6                | 5.003151                | -0.816742 | 0.635669  |
| 21               | 1                | 5.778408                | -1.452193 | 0.203967  |
| 22               | 1                | 5.467137                | 0.110974  | 0.978324  |
| 23               | 1                | 4.599981                | -1.337980 | 1.500473  |
| 24               | 6                | 5.552852                | -0.801881 | -2.310653 |
| 25               | 1                | 5.408446                | -0.796613 | -3.397529 |
| 26               | 1                | 6.469741                | -0.208811 | -2.145048 |
| 27               | 1                | 5.726196                | -1.813027 | -1.945862 |
| 28               | 6                | 2.620272                | 0.273649  | 2.695537  |
| 29               | 1                | 3.525247                | -0.313271 | 2.852970  |
| 30               | 1                | 1.947833                | 0.053434  | 3.529506  |
| 31               | 1                | 0.410433                | -1.573110 | 1.345077  |
| 32               | 6                | 0.595480                | 0.858323  | 1.421235  |

|    |    |           |           |           |
|----|----|-----------|-----------|-----------|
| 33 | 1  | 0.016194  | 0.463952  | 2.265019  |
| 34 | 1  | 0.858882  | 1.884459  | 1.703005  |
| 35 | 6  | -0.332995 | 0.897057  | 0.188066  |
| 36 | 1  | -0.499401 | -0.115201 | -0.193481 |
| 37 | 1  | 0.142050  | 1.471960  | -0.621620 |
| 38 | 6  | -1.688688 | 1.521270  | 0.477397  |
| 39 | 6  | -1.678355 | 2.995642  | 0.803759  |
| 40 | 1  | -2.676630 | 3.435867  | 0.823096  |
| 41 | 1  | -1.219829 | 3.187338  | 1.782093  |
| 42 | 1  | -1.086970 | 3.548104  | 0.062230  |
| 43 | 6  | -2.784811 | 0.745070  | 0.430845  |
| 44 | 6  | -4.202901 | 1.148884  | 0.699712  |
| 45 | 1  | -2.672145 | -0.306792 | 0.172557  |
| 46 | 1  | -4.328420 | 2.222141  | 0.840146  |
| 47 | 1  | 1.055601  | -1.484516 | -0.949355 |
| 48 | 1  | 1.402142  | -3.080411 | -0.334553 |
| 49 | 1  | -4.598319 | 0.642303  | 1.588036  |
| 50 | 8  | -6.648470 | -0.777780 | 0.597411  |
| 51 | 15 | -5.623557 | -0.655899 | -0.643473 |
| 52 | 8  | -4.637409 | -1.762038 | -0.761491 |
| 53 | 8  | -5.059993 | 0.827704  | -0.438465 |
| 54 | 8  | -6.578938 | -0.457307 | -1.921690 |
| 55 | 1  | -6.895324 | -1.695119 | 0.786680  |
| 56 | 1  | -6.226313 | -0.907597 | -2.702949 |
| 57 | 6  | 2.084581  | -2.526859 | 2.199652  |
| 58 | 1  | 3.171628  | -2.637720 | 2.137120  |
| 59 | 1  | 1.843780  | -2.248513 | 3.227883  |
| 60 | 1  | 1.651862  | -3.517754 | 2.026677  |
| 61 | 1  | 2.890105  | 1.330103  | 2.783573  |

Figure 3

A

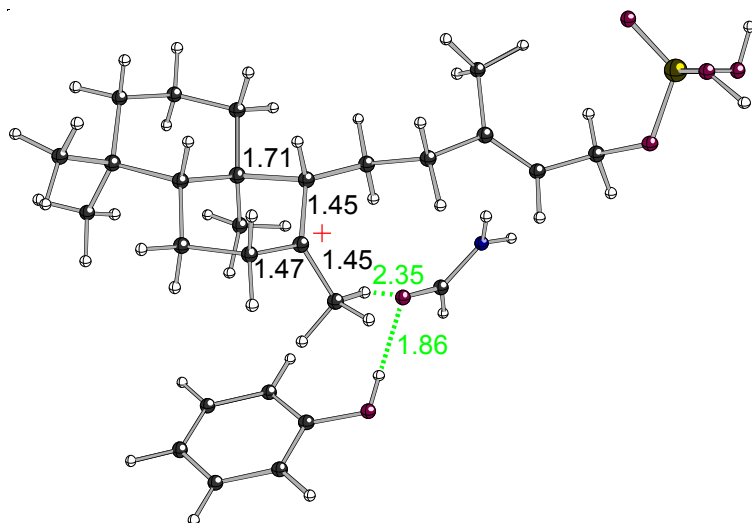

B3LYP/6-31G(d)//B3LYP/6-31G(d):  
HF = -1903.2544093 hartrees (-1194311.17437984 kcal/mol)  
Imaginary Frequencies: none found  
Zero-point correction = 0.696350 (Hartree/Particle)

mPW1PW91/6-31+G(d,p)//B3LYP/6-31G(d):  
HF = -1903.0143933 hartrees (-1194160.56193968 kcal/mol)

Coordinates (from last standard orientation):

| -----  |        |                         |           |           |
|--------|--------|-------------------------|-----------|-----------|
| Center | Atomic | Coordinates (Angstroms) |           |           |
| Number | Number | X                       | Y         | Z         |
| -----  |        |                         |           |           |
| 1      | 6      | -4.415968               | -3.071344 | 0.029965  |
| 2      | 6      | -3.189916               | -2.335799 | -0.641572 |
| 3      | 6      | -2.151544               | -1.720855 | 0.348506  |
| 4      | 6      | -1.666871               | -2.809567 | 1.331415  |
| 5      | 6      | -2.850414               | -3.491867 | 2.044915  |
| 6      | 6      | -3.845625               | -4.089403 | 1.049336  |
| 7      | 1      | -2.650295               | -3.153435 | -1.144465 |
| 8      | 1      | -1.099373               | -3.573854 | 0.783807  |
| 9      | 1      | -0.995058               | -2.378608 | 2.080116  |
| 10     | 1      | -2.447723               | -4.281906 | 2.689649  |
| 11     | 1      | -3.351498               | -2.784276 | 2.715399  |
| 12     | 1      | -3.347567               | -4.898132 | 0.495177  |
| 13     | 1      | -4.679731               | -4.555380 | 1.588126  |
| 14     | 6      | -0.793077               | -1.325761 | -0.608229 |
| 15     | 6      | -3.584679               | -1.344095 | -1.737704 |
| 16     | 1      | -4.247978               | -1.799459 | -2.476542 |
| 17     | 1      | -4.104614               | -0.468483 | -1.337188 |
| 18     | 6      | -2.310386               | -0.867430 | -2.538226 |
| 19     | 6      | -1.354684               | -0.360909 | -1.536678 |
| 20     | 6      | -5.436532               | -2.132153 | 0.706224  |
| 21     | 1      | -5.793033               | -1.351571 | 0.025285  |
| 22     | 1      | -6.312945               | -2.714227 | 1.012117  |
| 23     | 1      | -5.051110               | -1.640765 | 1.602000  |
| 24     | 6      | -5.168560               | -3.873450 | -1.056824 |
| 25     | 1      | -4.485298               | -4.483432 | -1.660175 |
| 26     | 1      | -5.884170               | -4.553677 | -0.582305 |
| 27     | 1      | -5.741157               | -3.228794 | -1.731916 |
| 28     | 6      | -2.602044               | -0.468663 | 1.119101  |
| 29     | 1      | -3.243553               | -0.744869 | 1.957197  |
| 30     | 1      | -1.742195               | 0.057866  | 1.543665  |
| 31     | 1      | -3.157735               | 0.252426  | 0.514251  |
| 32     | 1      | -0.617676               | -2.275179 | -1.125740 |
| 33     | 6      | 0.455420                | -0.926782 | 0.191751  |
| 34     | 1      | 0.295152                | 0.003976  | 0.743998  |
| 35     | 1      | 0.643850                | -1.707380 | 0.932365  |

|    |    |           |           |           |
|----|----|-----------|-----------|-----------|
| 36 | 6  | 1.708167  | -0.785601 | -0.702606 |
| 37 | 1  | 1.568244  | 0.029658  | -1.422788 |
| 38 | 1  | 1.827624  | -1.709030 | -1.289625 |
| 39 | 6  | 2.988716  | -0.562660 | 0.081501  |
| 40 | 6  | 3.387485  | -1.671950 | 1.032774  |
| 41 | 1  | 4.472718  | -1.773558 | 1.110215  |
| 42 | 1  | 2.976707  | -1.516096 | 2.039524  |
| 43 | 1  | 2.999067  | -2.633592 | 0.678131  |
| 44 | 6  | 3.713976  | 0.552140  | -0.132123 |
| 45 | 6  | 5.039779  | 0.891684  | 0.487906  |
| 46 | 1  | 3.366378  | 1.268834  | -0.876428 |
| 47 | 1  | 5.276234  | 0.243777  | 1.333929  |
| 48 | 1  | -1.904132 | -1.739742 | -3.061855 |
| 49 | 1  | -2.593387 | -0.101771 | -3.264960 |
| 50 | 1  | 5.059102  | 1.932260  | 0.827073  |
| 51 | 8  | 7.505230  | -0.631775 | -2.009631 |
| 52 | 15 | 7.115138  | -0.433093 | -0.464684 |
| 53 | 8  | 6.640518  | -1.667821 | 0.191685  |
| 54 | 8  | 6.088176  | 0.804230  | -0.517130 |
| 55 | 8  | 8.402825  | 0.272759  | 0.221514  |
| 56 | 1  | 7.924178  | 0.151813  | -2.404164 |
| 57 | 1  | 9.006537  | -0.395486 | 0.589538  |
| 58 | 6  | -1.168757 | 1.091881  | -1.429583 |
| 59 | 1  | -2.137778 | 1.612082  | -1.485497 |
| 60 | 1  | -0.605946 | 1.433898  | -0.563598 |
| 61 | 1  | -0.646251 | 1.416560  | -2.346989 |
| 62 | 6  | 0.867353  | 2.944870  | 2.213995  |
| 63 | 1  | 0.678419  | 3.793168  | 2.890723  |
| 64 | 8  | 0.015105  | 2.550152  | 1.411920  |
| 65 | 7  | 2.084146  | 2.398179  | 2.359882  |
| 66 | 1  | 2.390326  | 1.655597  | 1.735387  |
| 67 | 1  | 2.744983  | 2.777064  | 3.023967  |
| 68 | 1  | -1.082202 | 3.675646  | 0.426200  |
| 69 | 6  | -3.469828 | 3.232819  | 0.884570  |
| 70 | 6  | -4.845440 | 2.993642  | 0.911459  |
| 71 | 6  | -5.644445 | 3.299482  | -0.192406 |
| 72 | 6  | -5.052730 | 3.855945  | -1.330354 |
| 73 | 6  | -3.680975 | 4.100531  | -1.372567 |
| 74 | 6  | -2.881918 | 3.792930  | -0.260756 |
| 75 | 1  | -2.849639 | 3.007138  | 1.748515  |
| 76 | 1  | -5.294619 | 2.576639  | 1.809284  |
| 77 | 1  | -6.715090 | 3.121659  | -0.161432 |
| 78 | 1  | -5.664934 | 4.110423  | -2.191437 |
| 79 | 1  | -3.212930 | 4.548782  | -2.243975 |
| 80 | 8  | -1.547480 | 4.047051  | -0.352887 |

-----

TS (A-B1)

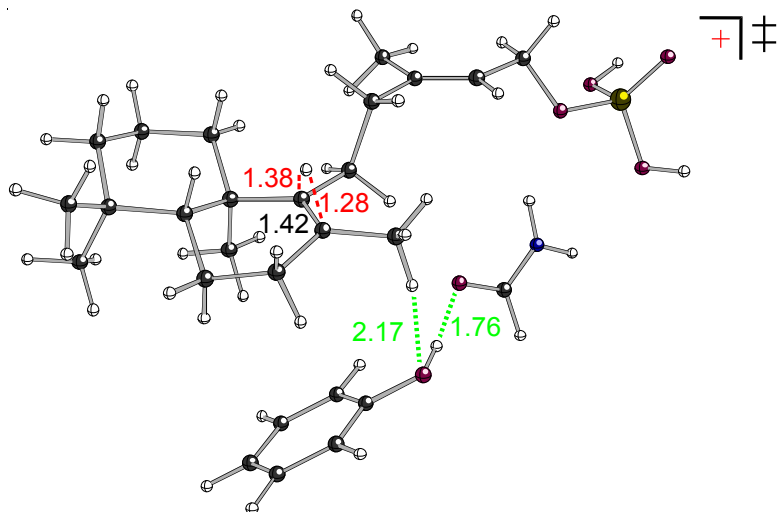

B3LYP/6-31G(d)//B3LYP/6-31G(d):  
 HF = -1903.2532378 hartrees (-1194310.43925188 kcal/mol)  
 Imaginary Frequencies: 1 (-464.2962 1/cm)  
 Zero-point correction = 0.695192 (Hartree/Particle)

mPW1PW91/6-31+G(d,p)//B3LYP/6-31G(d):  
 HF = -1903.0157786 hartrees (-1194161.43122929 kcal/mol)

Coordinates (from last standard orientation):

| Center Number | Atomic Number | Coordinates (Angstroms) |           |           |
|---------------|---------------|-------------------------|-----------|-----------|
|               |               | X                       | Y         | Z         |
| 1             | 6             | 5.112135                | -2.123341 | -0.030569 |
| 2             | 6             | 3.866385                | -1.385759 | 0.580684  |
| 3             | 6             | 2.557607                | -1.365895 | -0.287441 |
| 4             | 6             | 2.238509                | -2.821229 | -0.730157 |
| 5             | 6             | 3.426079                | -3.487560 | -1.437822 |
| 6             | 6             | 4.663676                | -3.516983 | -0.538097 |
| 7             | 1             | 3.604643                | -2.014779 | 1.451396  |
| 8             | 1             | 1.989805                | -3.418101 | 0.159505  |
| 9             | 1             | 1.361123                | -2.844782 | -1.385257 |
| 10            | 1             | 3.142092                | -4.510512 | -1.710619 |
| 11            | 1             | 3.642789                | -2.974761 | -2.382456 |
| 12            | 1             | 4.447123                | -4.154922 | 0.331555  |
| 13            | 1             | 5.500758                | -3.992239 | -1.063756 |
| 14            | 6             | 1.392133                | -0.773895 | 0.525078  |
| 15            | 6             | 4.155770                | 0.018270  | 1.129200  |
| 16            | 1             | 5.099616                | 0.036737  | 1.678715  |
| 17            | 1             | 4.259715                | 0.741899  | 0.315314  |
| 18            | 6             | 3.036353                | 0.464014  | 2.073552  |
| 19            | 6             | 1.635218                | 0.038343  | 1.666755  |
| 20            | 6             | 5.834729                | -1.345580 | -1.152856 |

|    |    |           |           |           |
|----|----|-----------|-----------|-----------|
| 21 | 1  | 6.038495  | -0.307653 | -0.868877 |
| 22 | 1  | 6.801159  | -1.820087 | -1.355966 |
| 23 | 1  | 5.287311  | -1.332421 | -2.098581 |
| 24 | 6  | 6.141645  | -2.356369 | 1.100402  |
| 25 | 1  | 5.679558  | -2.815901 | 1.982867  |
| 26 | 1  | 6.927262  | -3.034338 | 0.749429  |
| 27 | 1  | 6.636040  | -1.431843 | 1.416070  |
| 28 | 6  | 2.620247  | -0.430187 | -1.533776 |
| 29 | 1  | 3.408115  | -0.755959 | -2.210897 |
| 30 | 1  | 1.680797  | -0.463987 | -2.093935 |
| 31 | 1  | 2.808818  | 0.613557  | -1.272518 |
| 32 | 1  | 1.524140  | -1.228444 | 1.819878  |
| 33 | 6  | -0.036746 | -0.988323 | 0.048965  |
| 34 | 1  | -0.588790 | -0.045135 | 0.113613  |
| 35 | 1  | 0.012265  | -1.250850 | -1.008879 |
| 36 | 6  | -0.826865 | -2.107043 | 0.792559  |
| 37 | 1  | -0.918251 | -1.849024 | 1.853442  |
| 38 | 1  | -0.264419 | -3.047157 | 0.737630  |
| 39 | 6  | -2.208389 | -2.302444 | 0.191601  |
| 40 | 6  | -2.252133 | -3.110590 | -1.081989 |
| 41 | 1  | -3.229845 | -3.100292 | -1.566727 |
| 42 | 1  | -1.521476 | -2.743512 | -1.813681 |
| 43 | 1  | -1.992550 | -4.157974 | -0.877904 |
| 44 | 6  | -3.274852 | -1.776021 | 0.814107  |
| 45 | 6  | -4.704318 | -1.846313 | 0.381605  |
| 46 | 1  | -3.123024 | -1.230606 | 1.745415  |
| 47 | 1  | -5.330620 | -2.284144 | 1.166863  |
| 48 | 1  | 3.211976  | 0.111869  | 3.098378  |
| 49 | 1  | 2.996274  | 1.558538  | 2.138244  |
| 50 | 1  | -4.852371 | -2.406681 | -0.543170 |
| 51 | 8  | -6.702846 | 1.398504  | -0.238101 |
| 52 | 15 | -6.738428 | -0.203115 | 0.003293  |
| 53 | 8  | -7.639112 | -0.648863 | 1.084026  |
| 54 | 8  | -5.156090 | -0.470449 | 0.162323  |
| 55 | 8  | -6.999569 | -0.837852 | -1.455014 |
| 56 | 1  | -7.263762 | 1.831636  | 0.428593  |
| 57 | 1  | -7.936806 | -1.066124 | -1.580509 |
| 58 | 6  | 0.532524  | 0.725690  | 2.436063  |
| 59 | 1  | 0.476601  | 1.759809  | 2.066862  |
| 60 | 1  | -0.449058 | 0.268199  | 2.321313  |
| 61 | 1  | 0.788246  | 0.766195  | 3.499260  |
| 62 | 6  | -2.556724 | 2.688513  | -0.586594 |
| 63 | 1  | -2.600855 | 3.754168  | -0.861436 |
| 64 | 8  | -1.488743 | 2.151201  | -0.255571 |
| 65 | 7  | -3.734743 | 2.066484  | -0.651950 |
| 66 | 1  | -3.846355 | 1.095310  | -0.373234 |
| 67 | 1  | -4.583686 | 2.558156  | -0.896014 |
| 68 | 1  | -0.183920 | 3.166848  | 0.334278  |

|    |   |          |          |           |
|----|---|----------|----------|-----------|
| 69 | 6 | 1.718981 | 3.332266 | -1.248303 |
| 70 | 6 | 2.913285 | 3.462181 | -1.962114 |
| 71 | 6 | 4.073444 | 3.921314 | -1.335116 |
| 72 | 6 | 4.026375 | 4.266205 | 0.019373  |
| 73 | 6 | 2.840324 | 4.147814 | 0.742980  |
| 74 | 6 | 1.680754 | 3.677230 | 0.110312  |
| 75 | 1 | 0.814128 | 2.979849 | -1.737025 |
| 76 | 1 | 2.930253 | 3.209182 | -3.019252 |
| 77 | 1 | 4.996126 | 4.027839 | -1.897317 |
| 78 | 1 | 4.917064 | 4.643223 | 0.514967  |
| 79 | 1 | 2.785410 | 4.438801 | 1.788239  |
| 80 | 8 | 0.548964 | 3.566948 | 0.863591  |

**B1**

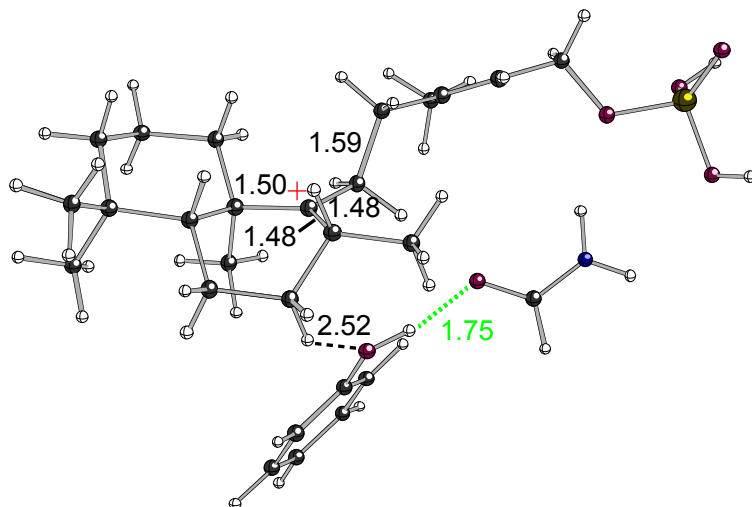

B3LYP/6-31G(d)//B3LYP/6-31G(d):  
 HF = -1903.2642515 hartrees (-1194317.35045876 kcal/mol)  
 Imaginary Frequencies: none found  
 Zero-point correction = 0.697682 (Hartree/Particle)

mPW1PW91/6-31+G(d,p)//B3LYP/6-31G(d):  
 HF = -1903.0219015 hartrees (-1194165.27341027 kcal/mol)

Coordinates (from last standard orientation):

| Center<br>Number | Atomic<br>Number | Coordinates (Angstroms) |           |           |
|------------------|------------------|-------------------------|-----------|-----------|
|                  |                  | X                       | Y         | Z         |
| 1                | 6                | 5.223500                | -2.189662 | 0.163385  |
| 2                | 6                | 3.829309                | -1.713097 | 0.714933  |
| 3                | 6                | 2.809782                | -1.146298 | -0.329451 |
| 4                | 6                | 2.696981                | -2.126829 | -1.548003 |
| 5                | 6                | 4.069874                | -2.496305 | -2.124503 |



|    |    |           |           |           |
|----|----|-----------|-----------|-----------|
| 6  | 6  | 4.977608  | -3.110096 | -1.057949 |
| 7  | 1  | 3.365724  | -2.652552 | 1.056833  |
| 8  | 1  | 2.209978  | -3.051843 | -1.211989 |
| 9  | 1  | 2.066397  | -1.691942 | -2.329978 |
| 10 | 1  | 3.912111  | -3.214200 | -2.938333 |
| 11 | 1  | 4.542015  | -1.621233 | -2.585882 |
| 12 | 1  | 4.522456  | -4.048582 | -0.707976 |
| 13 | 1  | 5.942753  | -3.384927 | -1.500219 |
| 14 | 6  | 1.459918  | -0.949267 | 0.292626  |
| 15 | 6  | 3.924662  | -0.799395 | 1.955888  |
| 16 | 1  | 4.434608  | -1.348882 | 2.751020  |
| 17 | 1  | 4.548746  | 0.072482  | 1.739791  |
| 18 | 6  | 2.542581  | -0.327029 | 2.456271  |
| 19 | 6  | 1.337783  | -1.043488 | 1.763278  |
| 20 | 6  | 6.206721  | -1.059318 | -0.213148 |
| 21 | 1  | 6.350414  | -0.346366 | 0.604876  |
| 22 | 1  | 7.187463  | -1.497010 | -0.429973 |
| 23 | 1  | 5.912882  | -0.492899 | -1.100264 |
| 24 | 6  | 5.910689  | -3.042946 | 1.255614  |
| 25 | 1  | 5.242374  | -3.821562 | 1.643852  |
| 26 | 1  | 6.790321  | -3.543842 | 0.836456  |
| 27 | 1  | 6.257755  | -2.438945 | 2.100124  |
| 28 | 6  | 3.183243  | 0.290744  | -0.857543 |
| 29 | 1  | 4.084297  | 0.204508  | -1.463557 |
| 30 | 1  | 2.395539  | 0.711976  | -1.484883 |
| 31 | 1  | 3.374020  | 0.994363  | -0.048235 |
| 32 | 1  | 1.511247  | -2.129207 | 1.930200  |
| 33 | 6  | 0.260804  | -0.713942 | -0.534846 |
| 34 | 1  | -0.380694 | 0.032314  | -0.056013 |
| 35 | 1  | 0.525308  | -0.363387 | -1.532767 |
| 36 | 6  | -0.602247 | -2.038138 | -0.692631 |
| 37 | 1  | -0.671149 | -2.565974 | 0.261781  |
| 38 | 1  | -0.080503 | -2.697292 | -1.394760 |
| 39 | 6  | -1.990430 | -1.721735 | -1.210532 |
| 40 | 6  | -2.046485 | -1.053494 | -2.561162 |
| 41 | 1  | -3.057120 | -0.992845 | -2.967913 |
| 42 | 1  | -1.659770 | -0.027901 | -2.499861 |
| 43 | 1  | -1.425871 | -1.591215 | -3.289205 |
| 44 | 6  | -3.053358 | -2.050058 | -0.457238 |
| 45 | 6  | -4.495832 | -1.851539 | -0.800508 |
| 46 | 1  | -2.885176 | -2.509326 | 0.515948  |
| 47 | 1  | -5.070708 | -2.757213 | -0.580760 |
| 48 | 1  | 2.433669  | -0.509561 | 3.529179  |
| 49 | 1  | 2.394372  | 0.744132  | 2.297143  |
| 50 | 1  | -4.662619 | -1.568913 | -1.841038 |
| 51 | 8  | -6.635829 | 0.708749  | 1.129674  |
| 52 | 15 | -6.604738 | -0.653538 | 0.256564  |
| 53 | 8  | -7.324533 | -1.796715 | 0.850432  |

|    |   |           |           |           |
|----|---|-----------|-----------|-----------|
| 54 | 8 | -5.008279 | -0.771932 | 0.049323  |
| 55 | 8 | -7.062776 | -0.214523 | -1.225347 |
| 56 | 1 | -7.118402 | 0.548276  | 1.959002  |
| 57 | 1 | -7.996690 | -0.432928 | -1.387798 |
| 58 | 6 | 0.005259  | -0.649070 | 2.408703  |
| 59 | 1 | -0.175261 | 0.423262  | 2.298781  |
| 60 | 1 | -0.851739 | -1.184148 | 1.992572  |
| 61 | 1 | 0.048633  | -0.875284 | 3.478108  |
| 62 | 6 | -2.578817 | 2.440217  | 0.707233  |
| 63 | 1 | -2.532018 | 3.492144  | 1.028674  |
| 64 | 8 | -1.558971 | 1.826141  | 0.357224  |
| 65 | 7 | -3.804084 | 1.916136  | 0.732158  |
| 66 | 1 | -3.977879 | 0.950459  | 0.459847  |
| 67 | 1 | -4.606989 | 2.460755  | 1.015028  |
| 68 | 1 | 0.111848  | 2.265527  | 0.630001  |
| 69 | 6 | 0.969031  | 4.014008  | -0.898105 |
| 70 | 6 | 1.578017  | 5.088890  | -1.547396 |
| 71 | 6 | 2.844205  | 5.529830  | -1.158916 |
| 72 | 6 | 3.498381  | 4.889363  | -0.103641 |
| 73 | 6 | 2.897698  | 3.819457  | 0.558989  |
| 74 | 6 | 1.631232  | 3.378386  | 0.159889  |
| 75 | 1 | -0.014200 | 3.664985  | -1.203539 |
| 76 | 1 | 1.057240  | 5.581597  | -2.364117 |
| 77 | 1 | 3.313564  | 6.365774  | -1.668295 |
| 78 | 1 | 4.479501  | 5.230837  | 0.214952  |
| 79 | 1 | 3.387487  | 3.335633  | 1.399635  |
| 80 | 8 | 1.080769  | 2.305274  | 0.816515  |

---
